# Supplementary material for: Organocatalytic enantioselective formal synthesis of bromopyrrole alkaloids via aza-Michael addition
Source: Royal Society of Chemistry journal article supplement (doi:10.1039/c1ob06078c), 2011-01-01

## Supporting Information

### “Organocatalytic Enantioselective Formal Synthesis of Bromopyrrole Alkaloids via Aza-Michael Addition”

Su-Jeong Lee, Seok-Ho Youn and Chang-Woo Cho\*

*Department of Chemistry, Kyungpook National University, Daegu 702-701, South Korea*

*E-mail: cwcho@knu.ac.kr*

### Table of Contents

|                                                                                       |         |
|---------------------------------------------------------------------------------------|---------|
| <b>Experimental Section</b>                                                           | S2      |
| General methods                                                                       |         |
| Representative procedure for the organocatalytic enantioselective conjugate additions |         |
| <b>Spectral data and HPLC traces for compounds 3, 5–15</b>                            | S3-S38  |
| <b>Experimental details and spectral data for compounds 16–22</b>                     | S39-S52 |

### General methods:

All reactions were run under an atmosphere of argon, unless otherwise indicated. Anhydrous solvents were transferred by an oven-dried syringe. Flasks were flame-dried and cooled under a stream of nitrogen. Toluene was distilled from calcium hydride. Chemical reagents were purchased from Aldrich chemical company and used without further purification, unless otherwise noted. Pyrroles **1**<sup>1</sup> and  $\alpha,\beta$ -unsaturated aldehydes **2**<sup>2</sup> were prepared according to the previously reported procedures. Analytical thin-layer chromatography (TLC) was carried out using 0.2-mm commercial silica gel plates (DC-Fertigplatten Kieselgel 60 F<sub>254</sub>). Preparative column chromatography employing silica gel was performed according to the method of Still.<sup>3</sup> Melting points were determined on a Barnstead melting point apparatus in open capillaries and are uncorrected. Infrared spectra were recorded on a Perkin-Elmer spectrometer. Proton nuclear magnetic resonance (<sup>1</sup>H NMR) spectra were recorded with a Bruker (400 MHz) spectrometer. Chemical shifts are reported in delta ( $\delta$ ) units, parts per million (ppm) downfield from trimethylsilane. Coupling constants are reported in Hertz (Hz). Carbon-13 nuclear magnetic resonance (<sup>13</sup>C NMR) spectra were recorded with a Bruker 400 (100 MHz) spectrometer. Chemical shifts are reported in delta ( $\delta$ ) units, parts per million (ppm) relative to the center of the triplet at 77.00 ppm for deuteriochloroform. <sup>13</sup>C NMR spectra were routinely run with broadband decoupling. Mass spectral data were obtained from the Korea Basic Science Institute (Daegu) on a Jeol JMS 700 high resolution mass spectrometer. HPLC analysis was performed on an Agilent 1200 Series with UV detector, using chiral separation column (Chiralpak AD-H).

### Representative procedure for the organocatalytic enantioselective conjugate additions:

To a mixture of pyrrole **1** (100 mol %), organocatalyst (20 mol %) and PhCO<sub>2</sub>H (40 mol %) in toluene (0.1 M) was added  $\alpha,\beta$ -unsaturated aldehyde **2** (200 mol %) in one portion. The reaction mixture was allowed to stir at -20, -30, or -40 °C for 18 hours, at which point the aldehyde was directly reduced with either NaBH<sub>4</sub> (110 mol %) in EtOH (0.1 M) or BH<sub>3</sub>·SMe<sub>2</sub> (110 mol %) in THF (0.1 M) to alcohol. After 30 min the reaction was quenched by saturated aqueous NaHCO<sub>3</sub>. The mixture was poured into ethyl acetate, and the layers were separated. The organic layer was washed with saturated aqueous NaHCO<sub>3</sub> and brine, and dried over MgSO<sub>4</sub>. The organic layer was filtered and evaporated. The crude residue was purified by silica gel column chromatography.

---

1. (a) Smith, J. A.; Ng, S.; White, J. *Org. Biomol. Chem.* **2006**, *4*, 2477. (b) Schmuck, C.; Dudaczek, J. *Tetrahedron Lett.* **2005**, *46*, 7101.  
(c) Loader, C. E.; Anderson, H. J. *Can. J. Chem.* **1981**, *59*, 2673.  
2. Avi, M.; Gaisberger, R.; Feichtenhofer, S.; Griengl, H. *Tetrahedron* **2009**, *65*, 5418.  
3. Still, W. C.; Kahn, M.; Mitra, A. *J. Org. Chem.* **1978**, *43*, 2923.

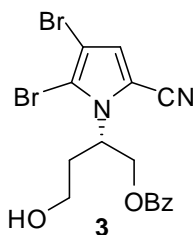

**Colorless Oil**

$[\alpha]_D^{22} +4.0$  (c 1, CH<sub>3</sub>OH) in the case of 76% ee (Table 1, entry 1)

**<sup>1</sup>H NMR (400 MHz, CDCl<sub>3</sub>)** δ 7.92 (d, *J* = 7.6 Hz, 2H), 7.58-7.55 (m, 1H), 7.44-7.40 (m, 2H), 6.99 (s, 1H), 5.33-5.22 (m, 1H), 4.81-4.67 (m, 2H), 3.83-3.77 (m, 1H), 3.50 (dt, *J* = 10.8, 3.6 Hz, 1H), 2.57-2.45 (m, 1H), 2.34-2.23 (m, 1H), 1.73 (s, 1H)

**<sup>13</sup>C NMR (100 MHz, CDCl<sub>3</sub>)** δ 165.8, 133.3, 129.5, 128.9, 128.4, 124.3, 113.7, 112.7, 102.6, 99.5, 65.2, 57.9, 57.2, 32.6

**FTIR (neat)** 3487, 3125, 2956, 2221, 1722, 1415, 1314, 1270, 1118, 711 cm<sup>-1</sup>

**HRMS (EI)** calcd for [M]<sup>+</sup> C<sub>16</sub>H<sub>14</sub>Br<sub>2</sub>N<sub>2</sub>O<sub>3</sub> 439.9371, found 439.9373

**HPLC Condition to determine enantiomeric excess:**

Chiral column: Chiralpak AD-H (250 x 4.6 mm)

Mobile Phase (90/10 = Hexane/IPA)

Flow Rate (0.9 mL/min), Detection Wavelength (254 nm)

Retention Time: 24.9 min (minor isomer), 27.2 min (major isomer)

### Racemate of **3**

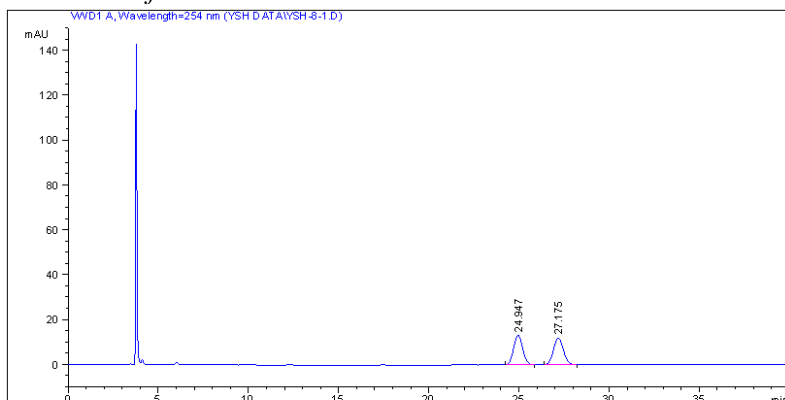

=====  
Area Percent Report  
=====

Sorted By : Signal  
Multiplier : 1.0000  
Dilution : 1.0000  
Use Multiplier & Dilution Factor with ISTDs

Signal 1: VWD1 A, Wavelength=254 nm

| Peak # | RetTime [min] | Type | Width [min] | Area mAU*s | Height [mAU] | Area %  |
|--------|---------------|------|-------------|------------|--------------|---------|
| 1      | 24.947        | BB   | 0.5481      | 462.84396  | 13.17890     | 50.0119 |
| 2      | 27.175        | BB   | 0.6012      | 462.62314  | 12.03768     | 49.9881 |

Totals : 925.46710 25.21658

### Enantiomeric excess of **3**: 76% (Table 1, entry 4)

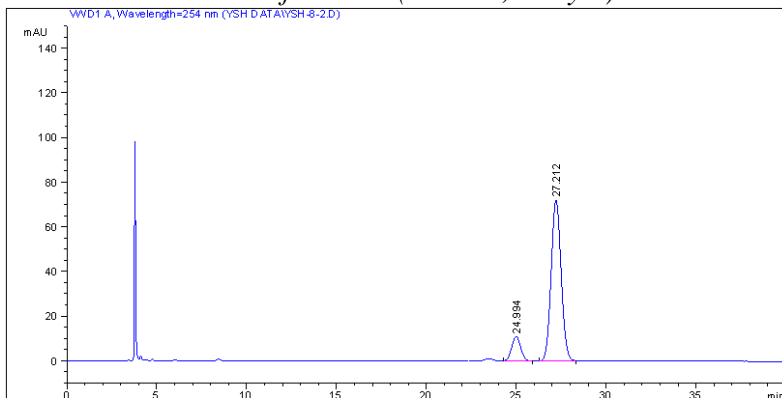

=====  
Area Percent Report  
=====

Sorted By : Signal  
Multiplier : 1.0000  
Dilution : 1.0000  
Use Multiplier & Dilution Factor with ISTDs

Signal 1: VWD1 A, Wavelength=254 nm

| Peak # | RetTime [min] | Type | Width [min] | Area mAU*s | Height [mAU] | Area %  |
|--------|---------------|------|-------------|------------|--------------|---------|
| 1      | 24.994        | BB   | 0.5411      | 384.92709  | 10.99052     | 12.1288 |
| 2      | 27.212        | BB   | 0.6032      | 2788.73145 | 72.01487     | 87.8712 |

Totals : 3173.65854 83.00539

$^1\text{H NMR}$  of **3**

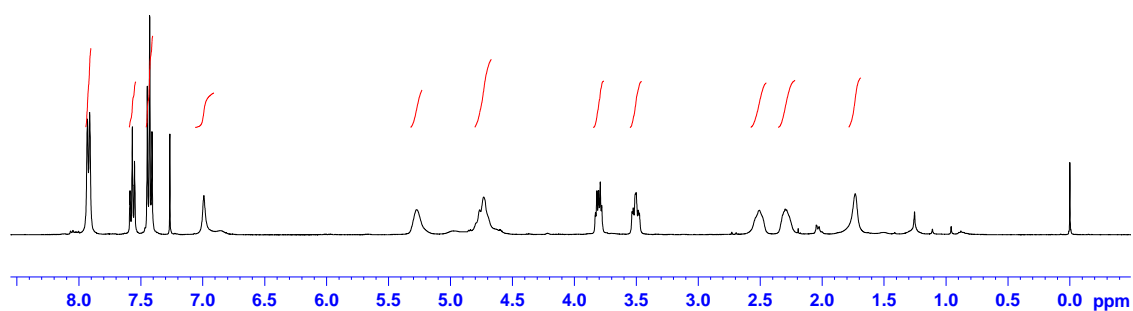

$^{13}\text{C NMR}$  of **3**

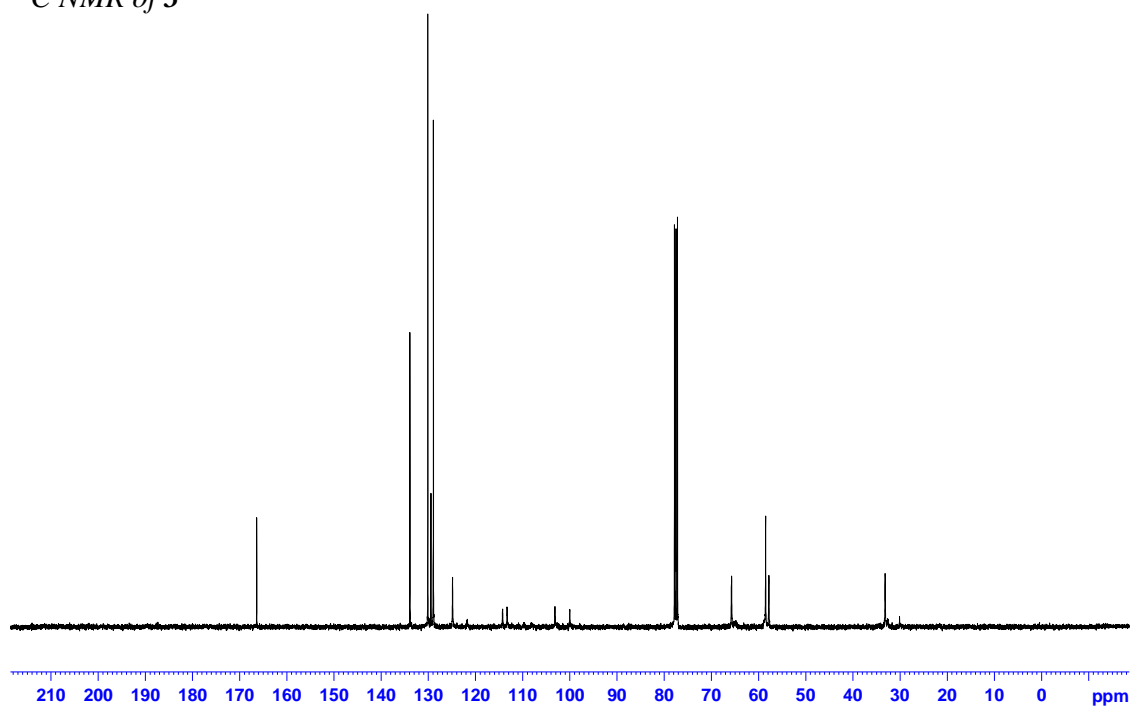

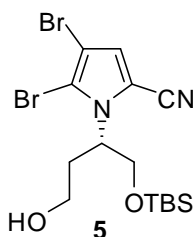

**White Solid**

**M.P.** 70~72 °C

$[\alpha]_D^{22}$  -12.0 (c 1, CH<sub>3</sub>OH) in the case of 80% ee (Table 1, entry 3)

**<sup>1</sup>H NMR (400 MHz, CDCl<sub>3</sub>)** δ 6.95 (s, 1H), 4.99-4.88 (m, 1H), 4.09-4.05 (m, 1H), 3.90 (dd, *J* = 10.8, 5.2 Hz, 1H), 3.75-3.71 (m, 1H), 3.53-3.43 (m, 1H), 2.43-2.32 (m, 1H), 2.18-2.08 (m, 1H), 1.48 (s, 1H), 0.79 (s, 9H), 0.01 (s, 3H), -0.05 (s, 3H)

**<sup>13</sup>C NMR (100 MHz, CDCl<sub>3</sub>)** δ 123.7, 114.1, 113.0, 102.3, 98.9, 64.4, 60.5, 58.4, 32.4, 25.4, 17.8, -5.6, -5.8

**FTIR (neat)** 3438, 2928, 2855, 2221, 1413, 1319, 1249, 1109, 835, 777 cm<sup>-1</sup>

**HRMS (FAB)** calcd for [M+H]<sup>+</sup> C<sub>15</sub>H<sub>25</sub>O<sub>2</sub>N<sub>2</sub>Br<sub>2</sub>Si 451.0052, found 451.0049

**HPLC Condition to determine enantiomeric excess:**

Chiral column: Chiralpak AD-H (250 x 4.6 mm)

Mobile Phase (90/10 = Hexane/IPA)

Flow Rate (0.9 mL/min), Detection Wavelength (254 nm)

Retention Time: 5.6 min (minor isomer), 6.6 min (major isomer)

### Racemate of **5**

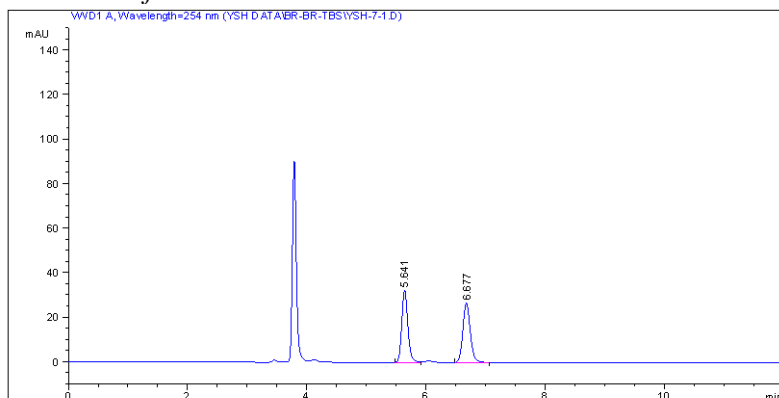

=====  
Area Percent Report  
=====

Sorted By : Signal  
Multiplier : 1.0000  
Dilution : 1.0000  
Use Multiplier & Dilution Factor with ISTDs

Signal 1: VMD1 A, Wavelength=254 nm

| Peak # | RetTime [min] | Type | Width [min] | Area mAU *s | Height [mAU] | Area %  |
|--------|---------------|------|-------------|-------------|--------------|---------|
| 1      | 5.641         | BV   | 0.1092      | 230.64087   | 32.41093     | 49.9814 |
| 2      | 6.677         | BB   | 0.1333      | 230.81219   | 26.59273     | 50.0186 |

Totals : 461.45306 59.00366

### Enantiomeric excess of **5**: 80% (Table 1, entry 6)

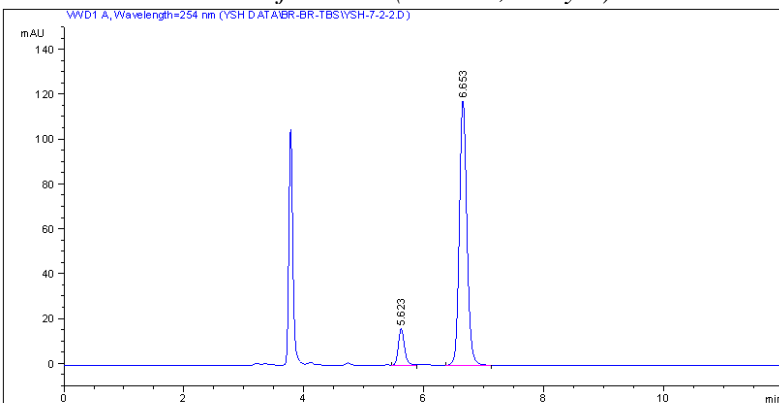

=====  
Area Percent Report  
=====

Sorted By : Signal  
Multiplier : 1.0000  
Dilution : 1.0000  
Use Multiplier & Dilution Factor with ISTDs

Signal 1: VMD1 A, Wavelength=254 nm

| Peak # | RetTime [min] | Type | Width [min] | Area mAU *s | Height [mAU] | Area %  |
|--------|---------------|------|-------------|-------------|--------------|---------|
| 1      | 5.623         | VV   | 0.1101      | 116.71778   | 16.23932     | 10.1279 |
| 2      | 6.653         | BB   | 0.1345      | 1035.72546  | 117.95556    | 89.8721 |

Totals : 1152.44324 134.19488

$^1\text{H NMR}$  of **5**

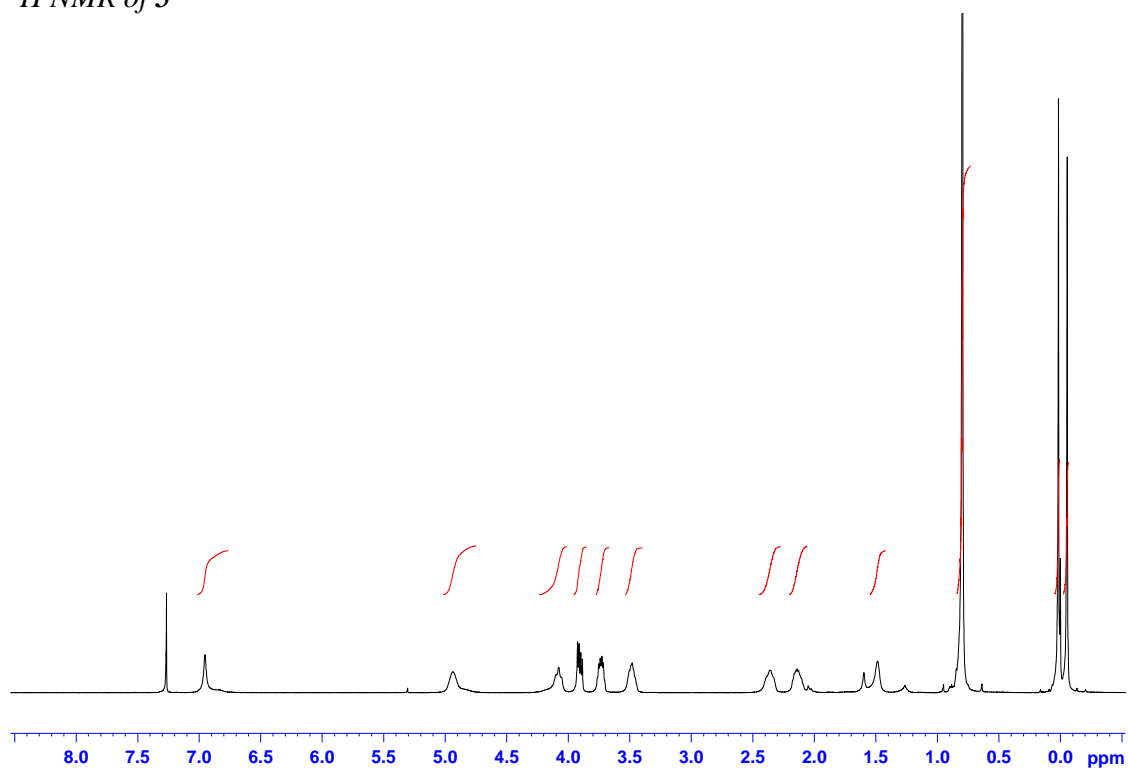

$^{13}\text{C NMR}$  of **5**

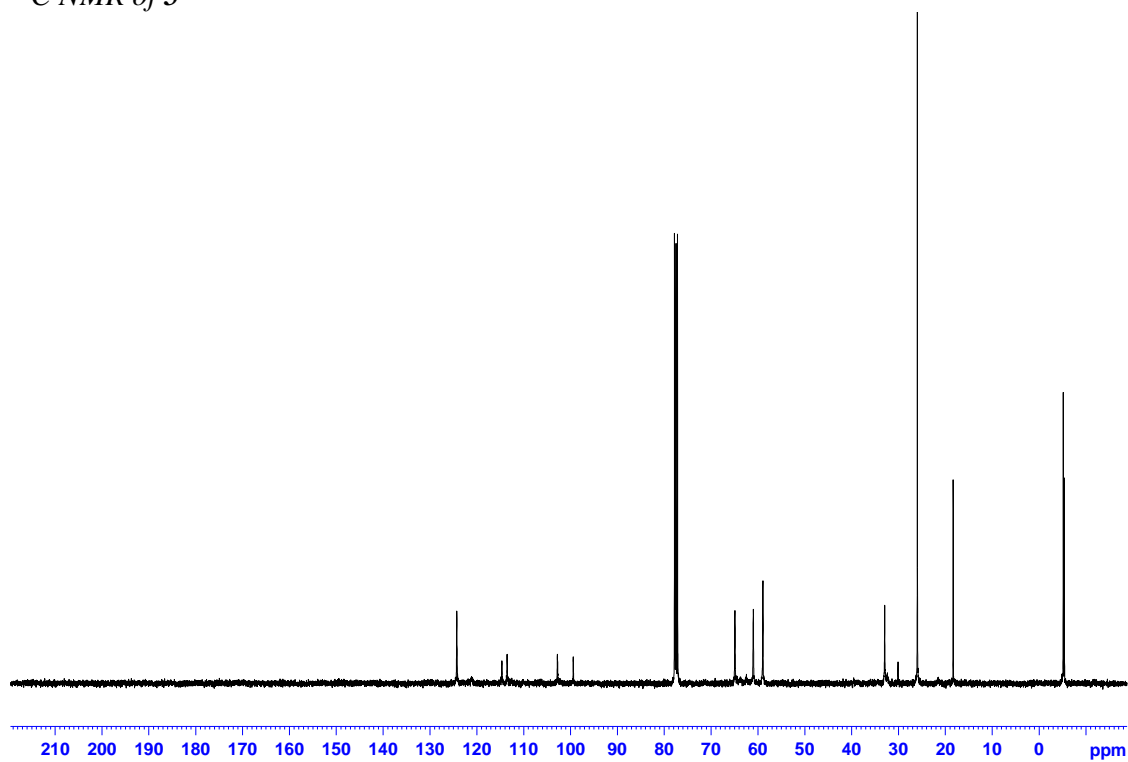



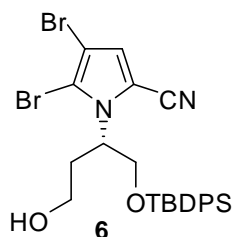

**White Solid**

**M.P.** 99~101 °C

$[\alpha]_D^{20} +18.2$  (c 1, CH<sub>3</sub>OH) in the case of 93% ee (Table 1, entry 6)

**<sup>1</sup>H NMR (400 MHz, CDCl<sub>3</sub>)** δ 7.61-7.56 (m, 2H), 7.51-7.34 (m, 8H), 6.91 (s, 1H), 5.07-4.96 (m, 1H), 4.11 (t, *J* = 10.0 Hz, 1H), 3.93-3.87 (m, 1H), 3.70-3.63 (m, 1H), 3.47-3.38 (m, 1H), 2.36-2.25 (m, 1H), 2.11-2.00 (m, 1H), 1.42 (s, 1H), 0.96 (s, 9H)

**<sup>13</sup>C NMR (100 MHz, CDCl<sub>3</sub>)** δ 135.4, 132.6, 132.3, 129.9, 129.8, 127.7, 123.8, 114.2, 112.8, 102.4, 99.0, 65.0, 60.3, 58.2, 32.3, 26.4, 18.9

**FTIR (neat)** 3391, 2929, 2858, 2223, 2102, 1416, 1311, 1113, 700 cm<sup>-1</sup>

**HRMS (EI)** calcd for [M]<sup>+</sup> C<sub>25</sub>H<sub>28</sub>Br<sub>2</sub>N<sub>2</sub>O<sub>2</sub>Si 574.0287, found 574.0286

**HPLC Condition to determine enantiomeric excess:**

Chiral column: Chiralpak AD-H (250 x 4.6 mm)

Mobile Phase (95/5 = Hexane/IPA)

Flow Rate (1.0 mL/min), Detection Wavelength (254 nm)

Retention Time: 7.8 min (minor isomer), 8.7 min (major isomer)

### Racemate of **6**

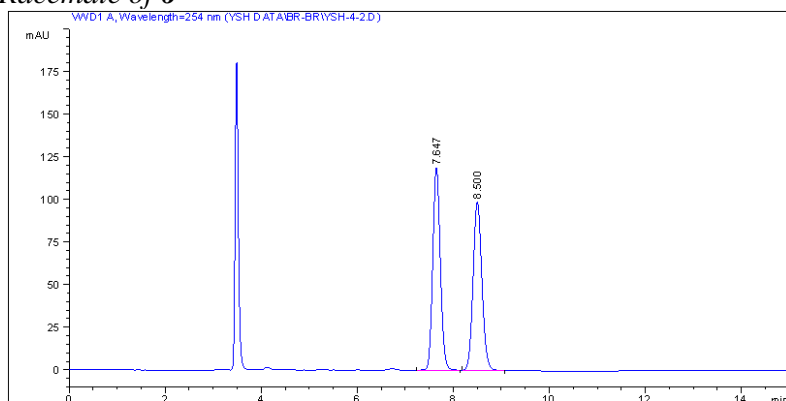

```
=====  
Area Percent Report  
=====
```

Sorted By : Signal  
Multiplier : 1.0000  
Dilution : 1.0000  
Use Multiplier & Dilution Factor with ISTDs

Signal 1: VWD1 A, Wavelength=254 nm

| Peak # | RetTime [min] | Type | Width [min] | Area mAU *s | Height [mAU] | Area %  |
|--------|---------------|------|-------------|-------------|--------------|---------|
| 1      | 7.647         | VB   | 0.1686      | 1302.55652  | 118.87830    | 50.6750 |
| 2      | 8.500         | BB   | 0.1990      | 1267.85608  | 98.96604     | 49.3250 |

Totals : 2570.41260 217.84435

### Enantiomeric excess of **6**: 93% (Table 1, entry 9)

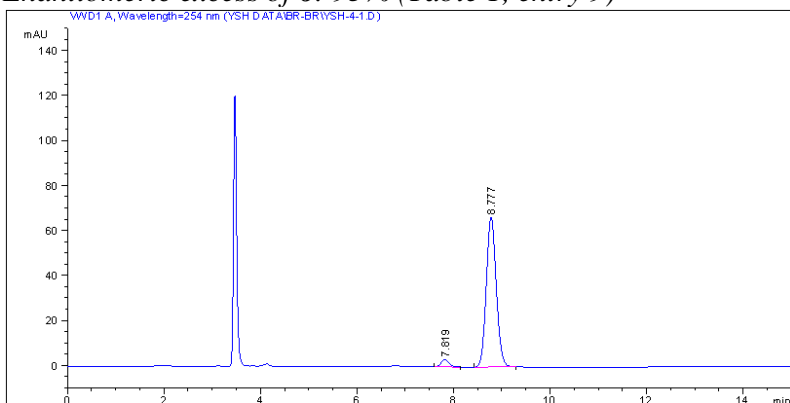

```
=====  
Area Percent Report  
=====
```

Sorted By : Signal  
Multiplier : 1.0000  
Dilution : 1.0000  
Use Multiplier & Dilution Factor with ISTDs

Signal 1: VWD1 A, Wavelength=254 nm

| Peak # | RetTime [min] | Type | Width [min] | Area mAU *s | Height [mAU] | Area %  |
|--------|---------------|------|-------------|-------------|--------------|---------|
| 1      | 7.819         | BB   | 0.1813      | 37.34903    | 3.16520      | 3.7491  |
| 2      | 8.777         | BB   | 0.2235      | 958.85693   | 66.52519     | 96.2509 |

Totals : 996.20597 69.69039

$^1\text{H NMR}$  of **6**

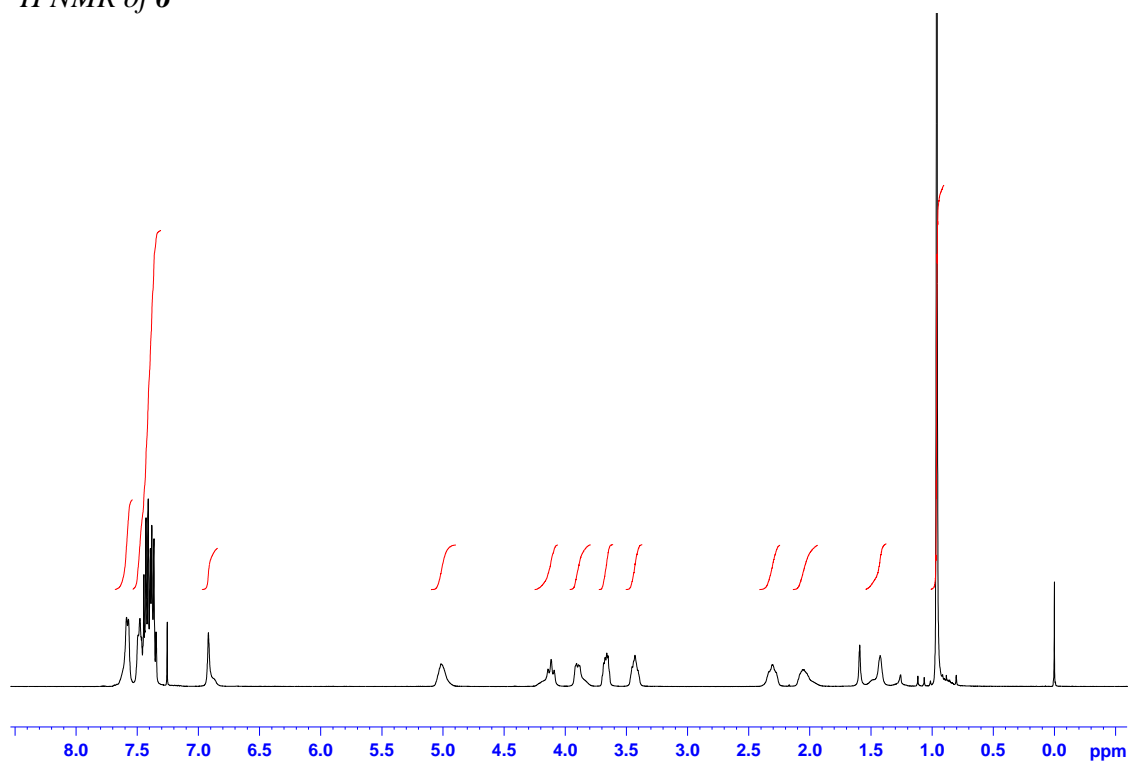

$^{13}\text{C NMR}$  of **6**

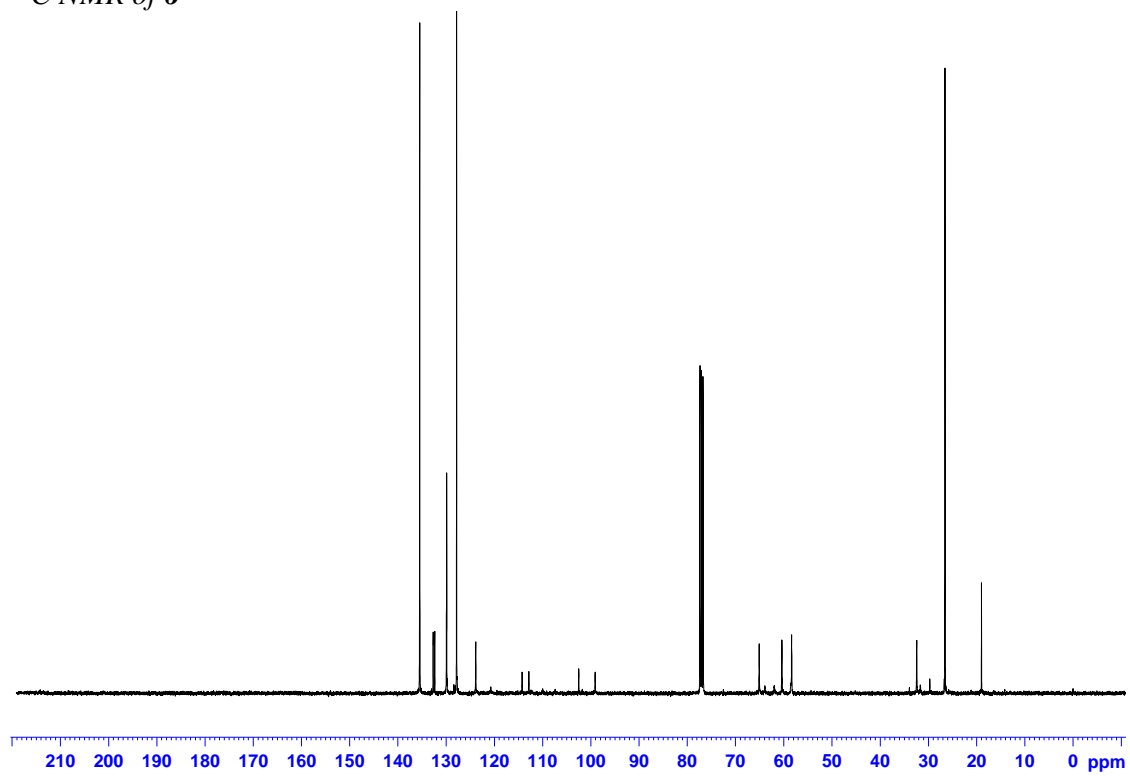

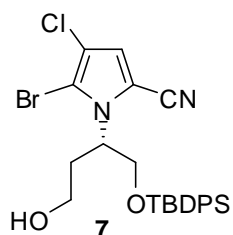

### Yellow Oil

$[\alpha]_D^{21} +26.8$  (c 1, CH<sub>3</sub>OH)

**<sup>1</sup>H NMR (400 MHz, CDCl<sub>3</sub>)** δ 7.63-7.55 (m, 2H), 7.51-7.33 (m, 8H), 6.85 (s, 1H), 5.03-4.93 (m, 1H), 4.12 (t, *J* = 9.6 Hz, 1H), 3.93-3.86 (m, 1H), 3.68-3.63 (m, 1H), 3.42 (dt, *J* = 10.0, 3.6 Hz, 1H), 2.36-2.25 (m, 1H), 2.10-1.99 (m, 1H), 1.49 (s, 1H), 0.96 (s, 9H)

**<sup>13</sup>C NMR (100 MHz, CDCl<sub>3</sub>)** δ 135.4, 132.6, 132.2, 129.9, 129.8, 127.7, 121.1, 113.4, 112.9, 111.7, 101.4, 64.9, 59.8, 58.2, 32.3, 26.4, 18.9

**FTIR (neat)** 3368, 3114, 2929, 2858, 2224, 1426, 1329, 1113, 825, 701, 508 cm<sup>-1</sup>

**HRMS (EI)** calcd for [M]<sup>+</sup> C<sub>25</sub>H<sub>28</sub>BrClN<sub>2</sub>O<sub>2</sub>Si 530.0792, found 530.0791

### **HPLC Condition to determine enantiomeric excess:**

Chiral column: Chiralpak AD-H (250 x 4.6 mm)

Mobile Phase (95/5 = Hexane/IPA)

Flow Rate (1.0 mL/min), Detection Wavelength (254 nm)

Retention Time: 7.4 min (minor isomer), 8.5 min (major isomer)

### Racemate of 7

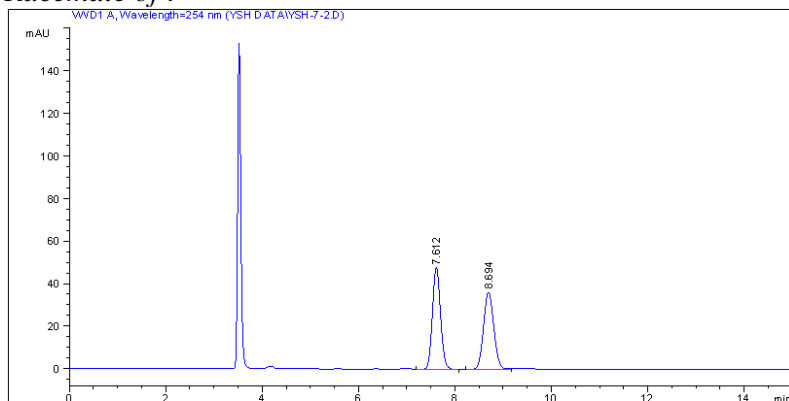

=====  
Area Percent Report  
=====

Sorted By : Signal  
Multiplier : 1.0000  
Dilution : 1.0000  
Use Multiplier & Dilution Factor with ISTDs

Signal 1: VWD1 A, Wavelength=254 nm

| Peak # | RetTime [min] | Type | Width [min] | Area mAU *s | Height [mAU] | Area %  |
|--------|---------------|------|-------------|-------------|--------------|---------|
| 1      | 7.612         | VB   | 0.1818      | 561.38043   | 47.90997     | 50.8621 |
| 2      | 8.694         | BB   | 0.2321      | 542.34937   | 36.40378     | 49.1379 |

Totals : 1103.72980 84.31375

### Enantiomeric excess of 7: 93%

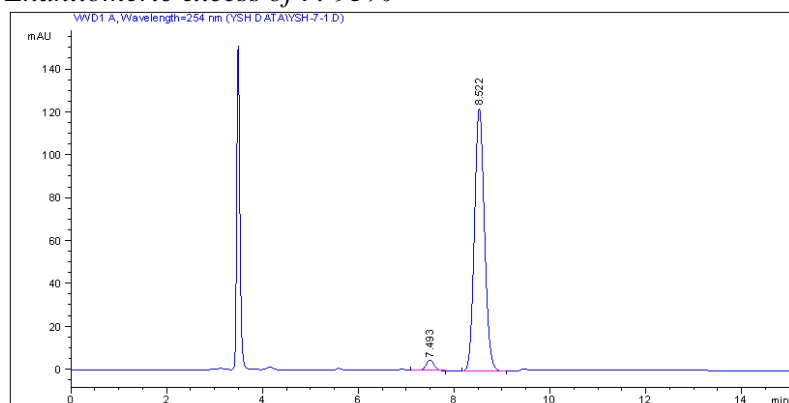

=====  
Area Percent Report  
=====

Sorted By : Signal  
Multiplier : 1.0000  
Dilution : 1.0000  
Use Multiplier & Dilution Factor with ISTDs

Signal 1: VWD1 A, Wavelength=254 nm

| Peak # | RetTime [min] | Type | Width [min] | Area mAU *s | Height [mAU] | Area %  |
|--------|---------------|------|-------------|-------------|--------------|---------|
| 1      | 7.493         | VB   | 0.1876      | 60.13028    | 4.92578      | 3.2671  |
| 2      | 8.522         | BB   | 0.2265      | 1780.34387  | 122.39133    | 96.7329 |

Totals : 1840.47415 127.31711

$^1\text{H NMR}$  of **7**

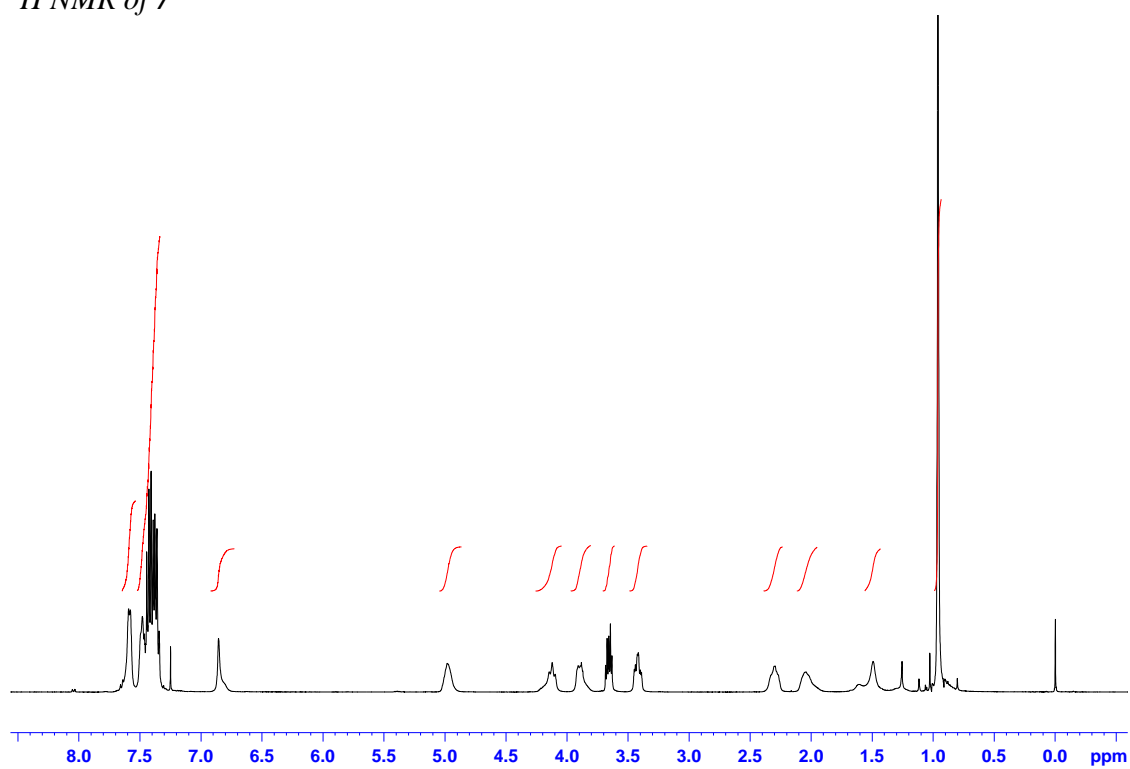

$^{13}\text{C NMR}$  of **7**

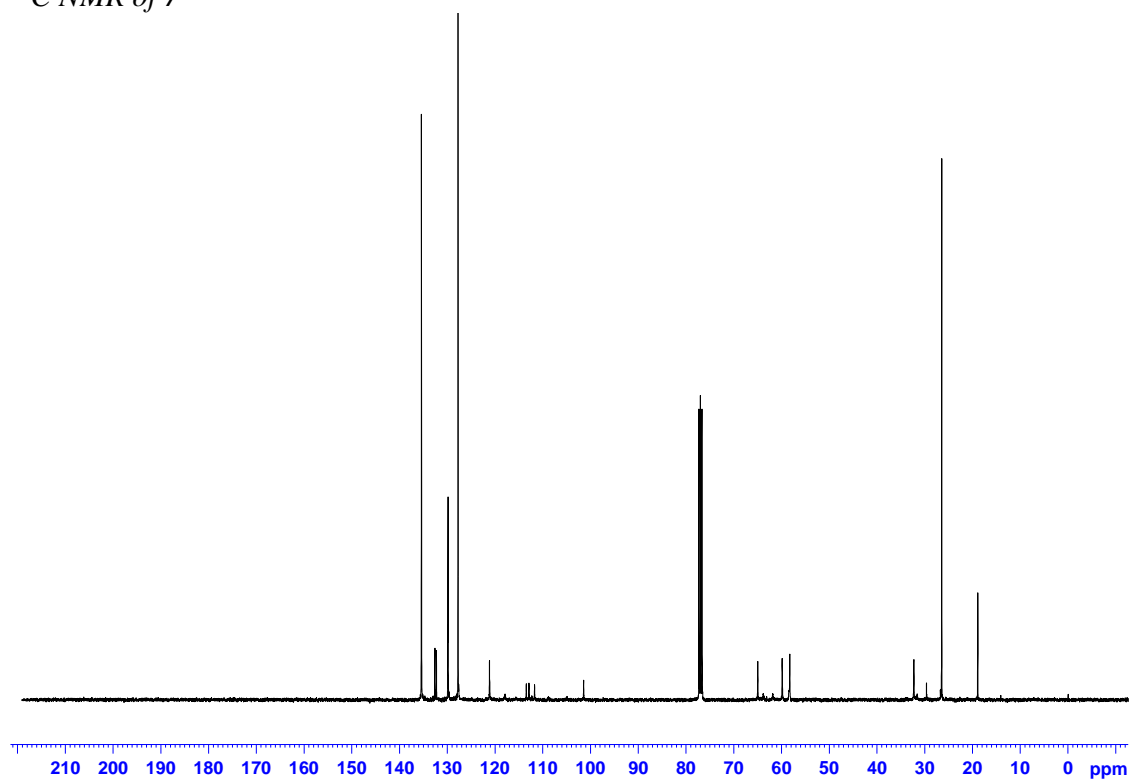

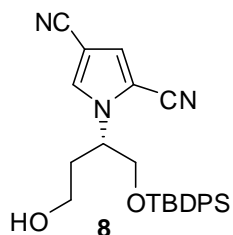

**Light Yellow Solid**

**M.P.** 93~95 °C

**$[\alpha]_D^{22}$  -9.0 (c 1, CH<sub>3</sub>OH)**

**$^1\text{H NMR}$  (400 MHz, CDCl<sub>3</sub>)**  $\delta$  7.52-7.37 (m, 10H), 7.32 (d,  $J = 1.2$  Hz, 1H), 7.03 (d,  $J = 1.6$  Hz, 1H), 4.71-4.65 (m, 1H), 3.91 (dd,  $J = 11.2, 3.6$  Hz, 1H), 3.83 (dd,  $J = 11.2, 7.2$  Hz, 1H), 3.67-3.62 (m, 1H), 3.44-3.38 (m, 1H), 2.10-1.99 (m, 2H), 1.57 (s, 1H), 1.00 (s, 9H)

**$^{13}\text{C NMR}$  (100 MHz, CDCl<sub>3</sub>)**  $\delta$  135.4, 135.3, 132.0, 131.9, 130.2, 130.1, 130.0, 127.8, 121.9, 114.2, 111.5, 106.3, 94.5, 65.5, 59.0, 57.8, 33.1, 26.5, 18.9

**FTIR (neat)** 3447, 3128, 2931, 2858, 2231, 1428, 1114, 702 cm<sup>-1</sup>

**HRMS (EI)** calcd for [M]<sup>+</sup> C<sub>26</sub>H<sub>29</sub>N<sub>3</sub>O<sub>2</sub>Si 443.2029, found 443.2032

**HPLC Condition to determine enantiomeric excess:**

Chiral column: Chiralpak AD-H (250 x 4.6 mm)

Mobile Phase (90/10 = Hexane/IPA)

Flow Rate (1.0 mL/min), Detection Wavelength (254 nm)

Retention Time: 6.0 min (minor isomer), 9.6 min (major isomer)

### Racemate of **8**

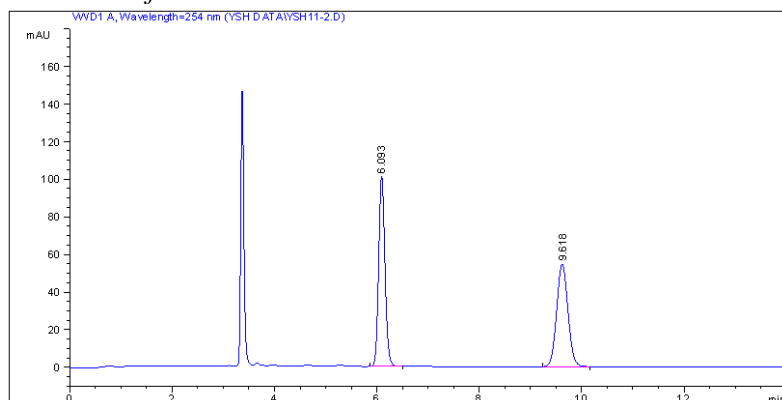

=====  
Area Percent Report  
=====

Sorted By : Signal  
Multiplier : 1.0000  
Dilution : 1.0000  
Use Multiplier & Dilution Factor with ISTDs

Signal 1: VMD1 A, Wavelength=254 nm

| Peak # | RetTime [min] | Type | Width [min] | Area mAU*s | Height [mAU] | Area %  |
|--------|---------------|------|-------------|------------|--------------|---------|
| 1      | 6.093         | BB   | 0.1319      | 865.35352  | 101.06882    | 50.8989 |
| 2      | 9.618         | BB   | 0.2366      | 834.78906  | 54.60849     | 49.1011 |

Totals : 1700.14258 155.67732

### Enantiomeric excess of **8**: 93%

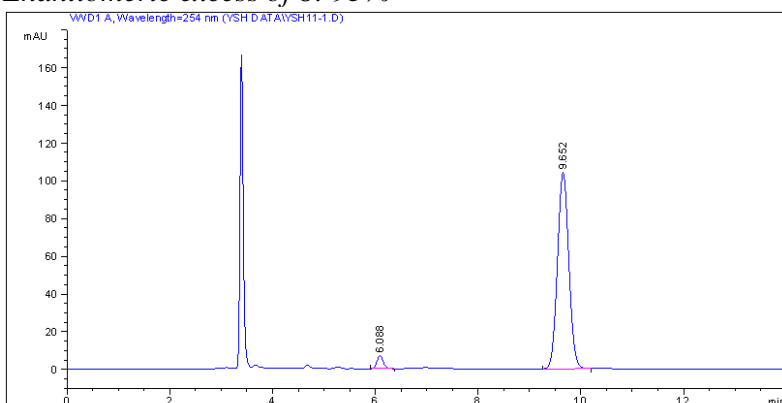

=====  
Area Percent Report  
=====

Sorted By : Signal  
Multiplier : 1.0000  
Dilution : 1.0000  
Use Multiplier & Dilution Factor with ISTDs

Signal 1: VMD1 A, Wavelength=254 nm

| Peak # | RetTime [min] | Type | Width [min] | Area mAU*s | Height [mAU] | Area %  |
|--------|---------------|------|-------------|------------|--------------|---------|
| 1      | 6.088         | BB   | 0.1326      | 59.66602   | 6.92044      | 3.6141  |
| 2      | 9.652         | BB   | 0.2384      | 1591.25574 | 103.86515    | 96.3859 |

Totals : 1650.92175 110.78559



$^1\text{H NMR}$  of **8**

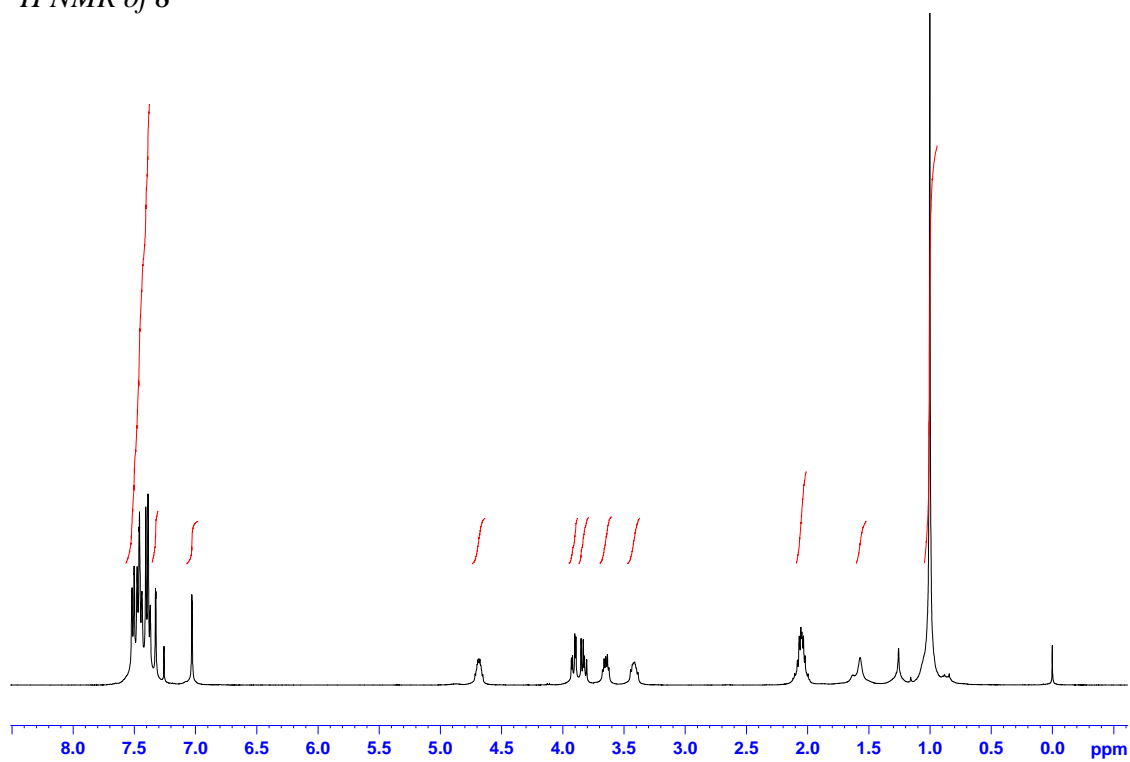

$^{13}\text{C NMR}$  of **8**

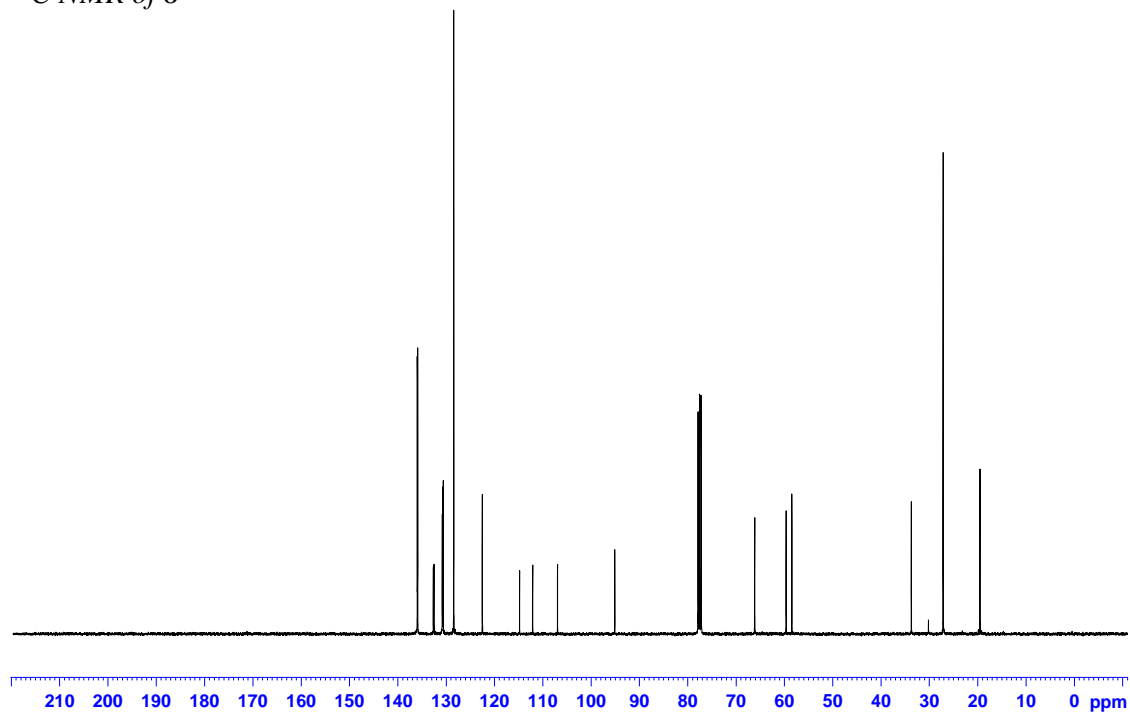

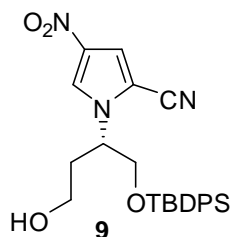

**Light Yellow Solid**

**M.P.** 88~90 °C

**$[\alpha]_D^{21} +16.1$  (c 1, CH<sub>3</sub>OH)**

**<sup>1</sup>H NMR (400 MHz, CDCl<sub>3</sub>)**  $\delta$  7.71 (d,  $J = 1.6$  Hz, 1H), 7.52-7.34 (m, 11H), 4.70-4.66 (m, 1H), 3.94 (dd,  $J = 11.2, 3.2$  Hz, 1H), 3.86 (dd,  $J = 11.2, 6.8$  Hz, 1H), 3.69-3.64 (m, 1H), 3.48-3.42 (m, 1H), 2.11-2.05 (m, 2H), 1.72 (s, 1H), 1.01 (s, 9H)

**<sup>13</sup>C NMR (100 MHz, CDCl<sub>3</sub>)**  $\delta$  136.4, 135.4, 135.3, 132.0, 131.9, 130.1, 130.1, 127.8, 123.9, 114.6, 111.2, 105.7, 65.5, 59.3, 57.9, 33.1, 26.6, 18.9

**FTIR (neat)** 3419, 3127, 2928, 2857, 2230, 1512, 1389, 1308, 1113, 702 cm<sup>-1</sup>

**HRMS (EI)** calcd for [M]<sup>+</sup> C<sub>25</sub>H<sub>29</sub>N<sub>3</sub>O<sub>4</sub>Si 463.1927, found 463.1932

**HPLC Condition to determine enantiomeric excess:**

Chiral column: Chiralpak AD-H (250 x 4.6 mm)

Mobile Phase (95/5 = Hexane/IPA)

Flow Rate (0.9 mL/min), Detection Wavelength (254 nm)

Retention Time: 11.2 min (minor isomer), 17.8 min (major isomer)

### Racemate of **9**

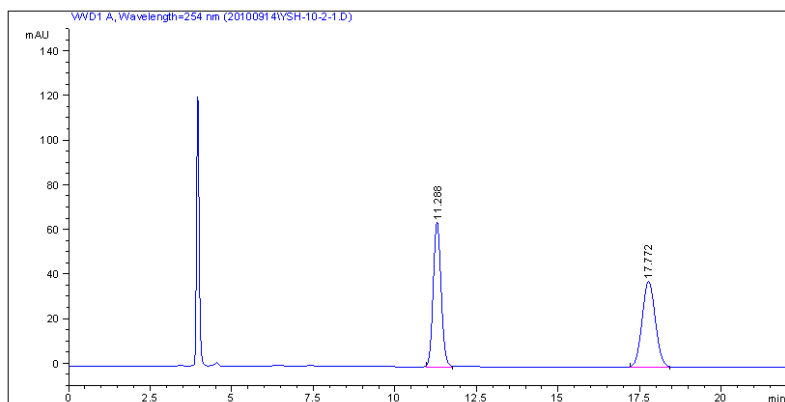

=====  
Area Percent Report  
=====

Sorted By : Signal  
Multiplier : 1.0000  
Dilution : 1.0000  
Use Multiplier & Dilution Factor with ISTDs

Signal 1: WVD1 A, Wavelength=254 nm

| Peak # | RetTime [min] | Type | Width [min] | Area mAU   | Area *s  | Height [mAU] | Area % |
|--------|---------------|------|-------------|------------|----------|--------------|--------|
| 1      | 11.288        | MM   | 0.2811      | 1095.77185 | 64.96107 | 49.7990      |        |
| 2      | 17.772        | MM   | 0.4742      | 1104.61572 | 38.82713 | 50.2010      |        |

### Enantiomeric excess of **9**: 91%

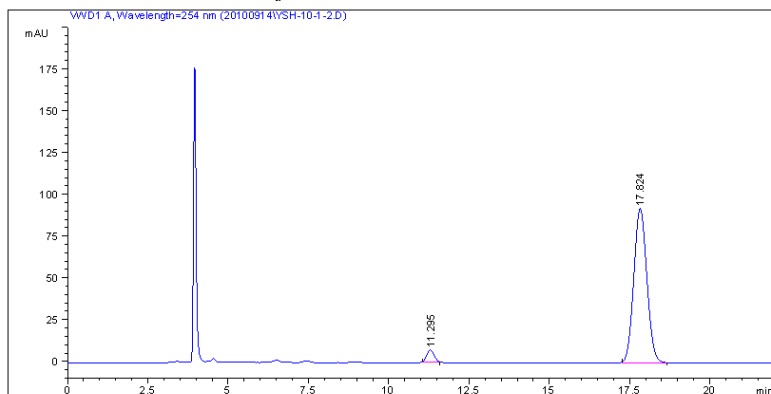

=====  
Area Percent Report  
=====

Sorted By : Signal  
Multiplier : 1.0000  
Dilution : 1.0000  
Use Multiplier & Dilution Factor with ISTDs

Signal 1: WVD1 A, Wavelength=254 nm

| Peak # | RetTime [min] | Type | Width [min] | Area mAU   | Area *s  | Height [mAU] | Area % |
|--------|---------------|------|-------------|------------|----------|--------------|--------|
| 1      | 11.295        | MM   | 0.2763      | 124.21130  | 7.49312  | 4.4963       |        |
| 2      | 17.824        | MM   | 0.4753      | 2638.28662 | 92.52138 | 95.5037      |        |

$^1\text{H NMR}$  of **9**

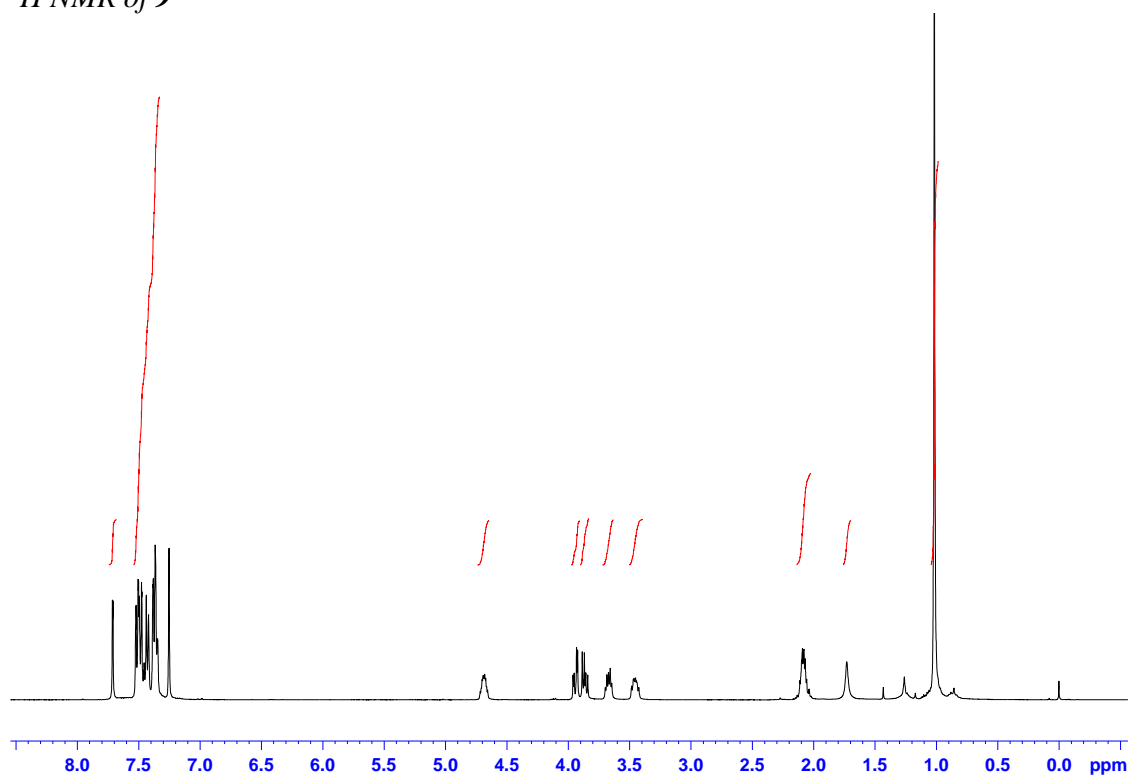

$^{13}\text{C NMR}$  of **9**

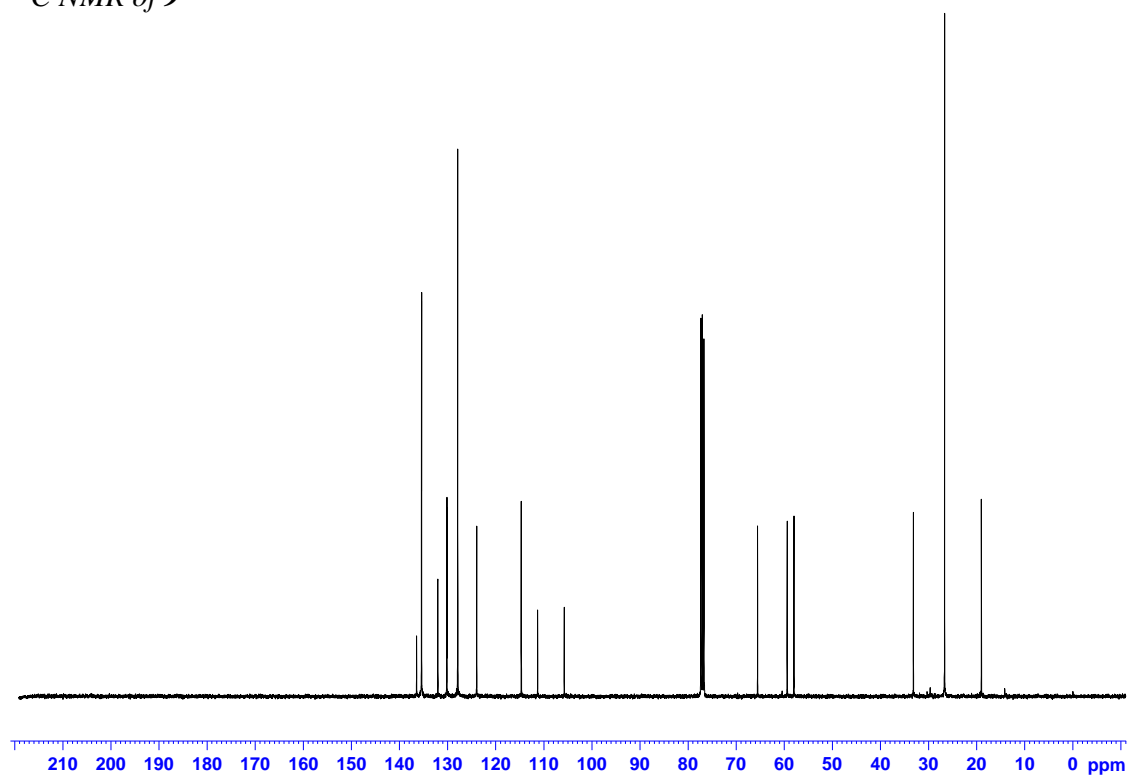

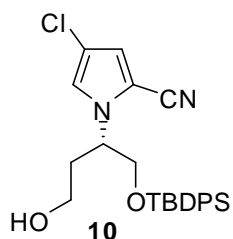

**Colorless Oil**

**$[\alpha]_D^{24}$  -8.2 (c 1, CH<sub>3</sub>OH)**

**$^1\text{H NMR}$  (400 MHz, CDCl<sub>3</sub>)**  $\delta$  7.54-7.35 (m, 10H), 6.87 (d,  $J = 1.6$  Hz, 1H), 6.70 (d,  $J = 1.6$  Hz, 1H), 4.61-4.55 (m, 1H), 3.85 (dd,  $J = 10.8, 3.6$  Hz, 1H), 3.76 (dd,  $J = 10.8, 6.8$  Hz, 1H), 3.65-3.59 (m, 1H), 3.46-3.40 (m, 1H), 2.04-1.98 (m, 2H), 1.58 (s, 1H), 1.00 (s, 9H)

**$^{13}\text{C NMR}$  (100 MHz, CDCl<sub>3</sub>)**  $\delta$  135.5, 135.4, 132.3, 132.2, 129.9, 129.9, 127.8, 127.8, 121.8, 118.2, 112.9, 112.6, 104.3, 66.1, 58.3, 58.3, 33.5, 26.5, 19.0

**$\text{FTIR}$  (neat)** 3394, 3114, 2930, 2858, 2223, 1427, 1128, 1113, 700 cm<sup>-1</sup>

**$\text{HRMS}$  (EI)** calcd for  $[\text{M}]^+$  C<sub>25</sub>H<sub>29</sub>ClN<sub>2</sub>O<sub>2</sub>Si 452.1687, found 452.1684

**HPLC Condition to determine enantiomeric excess:**

Chiral column: Chiralpak AD-H (250 x 4.6 mm)

Mobile Phase (95/5 = Hexane/IPA)

Flow Rate (0.95 mL/min), Detection Wavelength (254 nm)

Retention Time: 7.8 min (minor isomer), 10.1 min (major isomer)

### Racemate of **10**

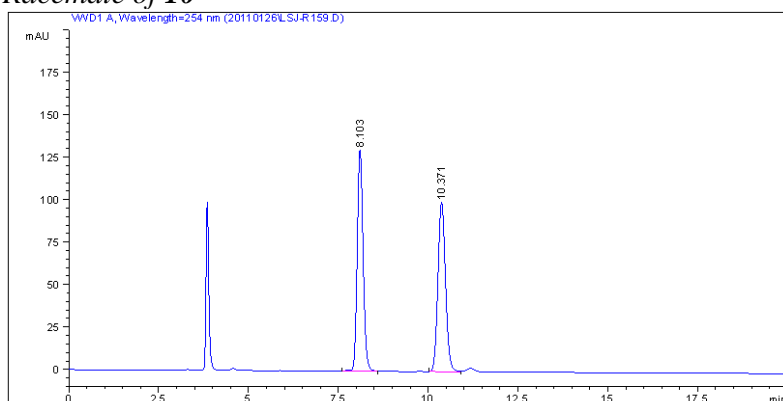

=====  
Area Percent Report  
=====

Sorted By : Signal  
Multiplier : 1.0000  
Dilution : 1.0000  
Use Multiplier & Dilution Factor with ISTDs

Signal 1: VWD1 A, Wavelength=254 nm

| Peak # | RetTime [min] | Type | Width [min] | Area mAU *s | Height [mAU] | Area %  |
|--------|---------------|------|-------------|-------------|--------------|---------|
| 1      | 8.103         | BB   | 0.1766      | 1483.76416  | 130.21782    | 50.2906 |
| 2      | 10.371        | BV   | 0.2285      | 1466.61914  | 99.63952     | 49.7094 |

Totals : 2950.38330 229.85734

### Enantiomeric excess of **10**: 93%

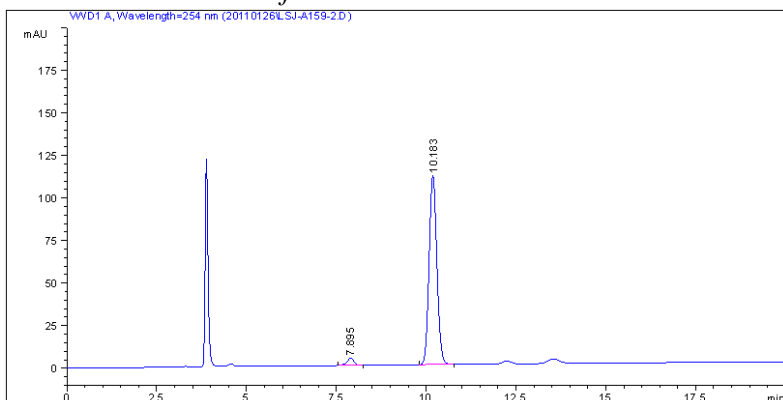

=====  
Area Percent Report  
=====

Sorted By : Signal  
Multiplier : 1.0000  
Dilution : 1.0000  
Use Multiplier & Dilution Factor with ISTDs

Signal 1: VWD1 A, Wavelength=254 nm

| Peak # | RetTime [min] | Type | Width [min] | Area mAU *s | Height [mAU] | Area %  |
|--------|---------------|------|-------------|-------------|--------------|---------|
| 1      | 7.895         | BB   | 0.1967      | 57.93516    | 4.41850      | 3.3546  |
| 2      | 10.183        | BB   | 0.2322      | 1669.08008  | 111.03948    | 96.6454 |

Totals : 1727.01524 115.45798

$^1\text{H NMR}$  of **10**

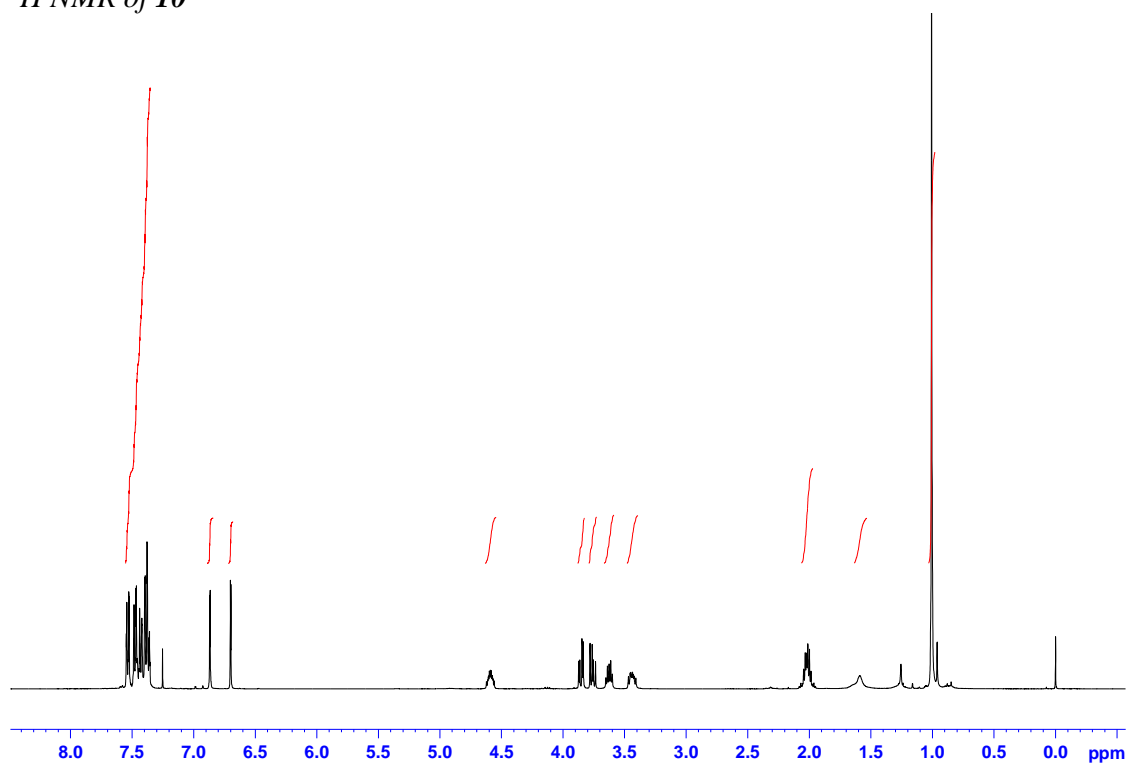

$^{13}\text{C NMR}$  of **10**

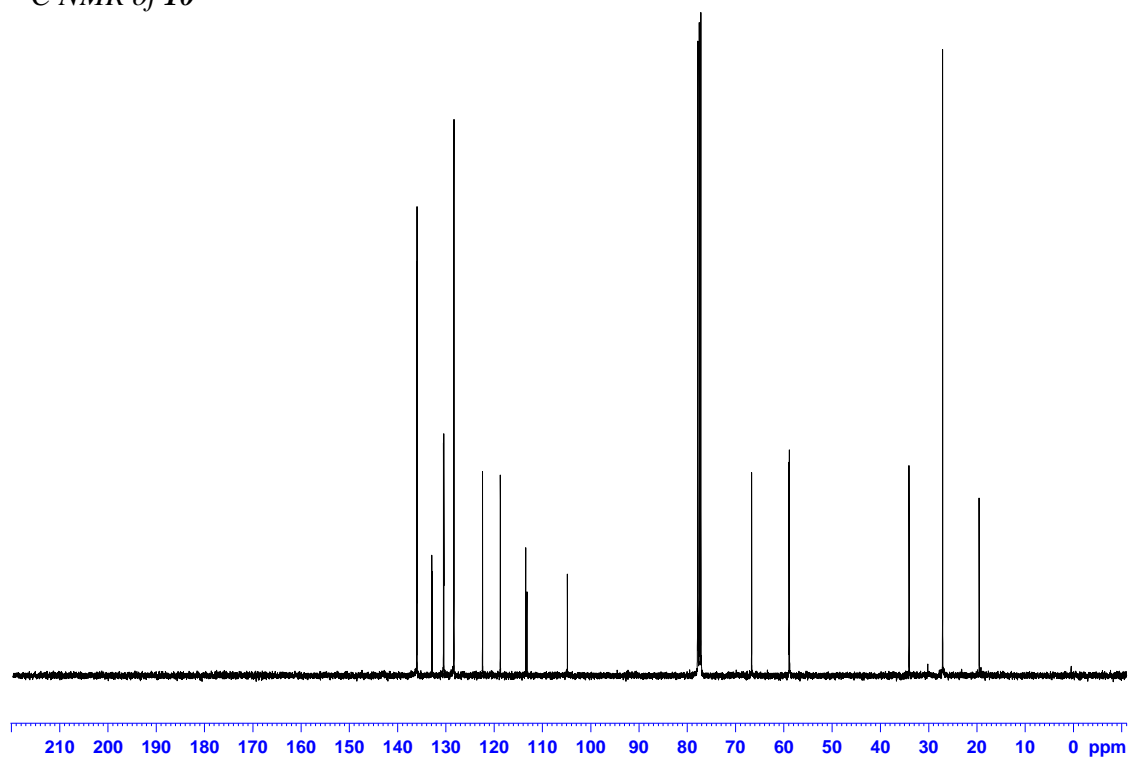

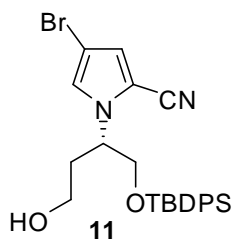

### Yellow Oil

$[\alpha]_D^{25} -9.3$  (c 1, CH<sub>3</sub>OH)

**<sup>1</sup>H NMR (400 MHz, CDCl<sub>3</sub>)** δ 7.54-7.36 (m, 10H), 6.92 (d, *J* = 1.6 Hz, 1H), 6.78 (d, *J* = 1.6 Hz, 1H), 4.64-4.58 (m, 1H), 3.85 (dd, *J* = 10.8, 3.6 Hz, 1H), 3.76 (dd, *J* = 10.8, 6.8 Hz, 1H), 3.67-3.61 (m, 1H), 3.49-3.41 (m, 1H), 2.06-2.00 (m, 2H), 1.47 (s, 1H), 1.00 (s, 9H)

**<sup>13</sup>C NMR (100 MHz, CDCl<sub>3</sub>)** δ 135.4, 135.4, 132.3, 132.2, 129.9, 129.9, 127.8, 124.3, 120.6, 112.5, 105.2, 96.4, 66.1, 58.3, 58.3, 33.5, 26.5, 19.0

**FTIR (neat)** 3446, 3071, 2931, 2858, 2221, 1427, 1318, 1113, 758, 702, 504 cm<sup>-1</sup>

**HRMS (EI)** calcd for [M]<sup>+</sup> C<sub>25</sub>H<sub>29</sub>BrN<sub>2</sub>O<sub>2</sub>Si 496.1182, found 496.1185

### **HPLC Condition to determine enantiomeric excess:**

Chiral column: Chiralpak AD-H (250 x 4.6 mm)

Mobile Phase (95/5 = Hexane/IPA)

Flow Rate (0.95 mL/min), Detection Wavelength (254 nm)

Retention Time: 9.0 min (minor isomer), 11.7 min (major isomer)



### Racemate of **11**

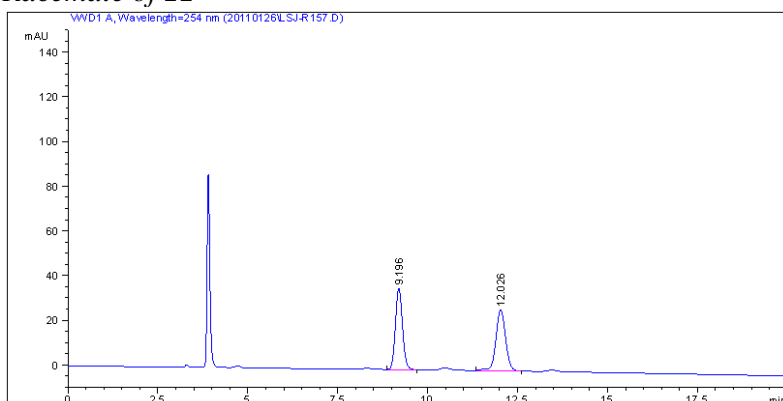

```
=====  
Area Percent Report  
=====
```

Sorted By : Signal  
Multiplier : 1.0000  
Dilution : 1.0000  
Use Multiplier & Dilution Factor with ISTDs

Signal 1: VWD1 A, Wavelength=254 nm

| Peak # | RetTime [min] | Type | Width [min] | Area mAU *s | Height [mAU] | Area %  |
|--------|---------------|------|-------------|-------------|--------------|---------|
| 1      | 9.196         | BB   | 0.2118      | 497.13705   | 36.39104     | 49.2742 |
| 2      | 12.026        | BB   | 0.2892      | 511.78235   | 27.40550     | 50.7258 |

Totals : 1008.91940 63.79654

### Enantiomeric excess of **11**: 94%

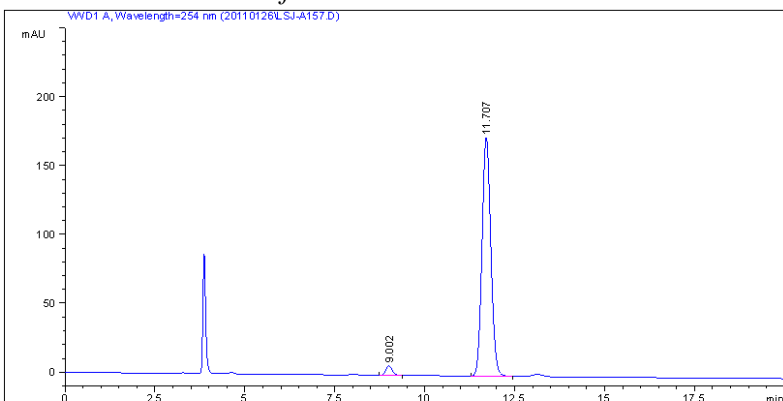

```
=====  
Area Percent Report  
=====
```

Sorted By : Signal  
Multiplier : 1.0000  
Dilution : 1.0000  
Use Multiplier & Dilution Factor with ISTDs

Signal 1: VWD1 A, Wavelength=254 nm

| Peak # | RetTime [min] | Type | Width [min] | Area mAU *s | Height [mAU] | Area %  |
|--------|---------------|------|-------------|-------------|--------------|---------|
| 1      | 9.002         | BB   | 0.1979      | 87.11239    | 6.84746      | 2.8538  |
| 2      | 11.707        | BB   | 0.2651      | 2965.43652  | 179.34142    | 97.1462 |

Totals : 3052.54891 180.18887

$^1\text{H NMR}$  of **11**

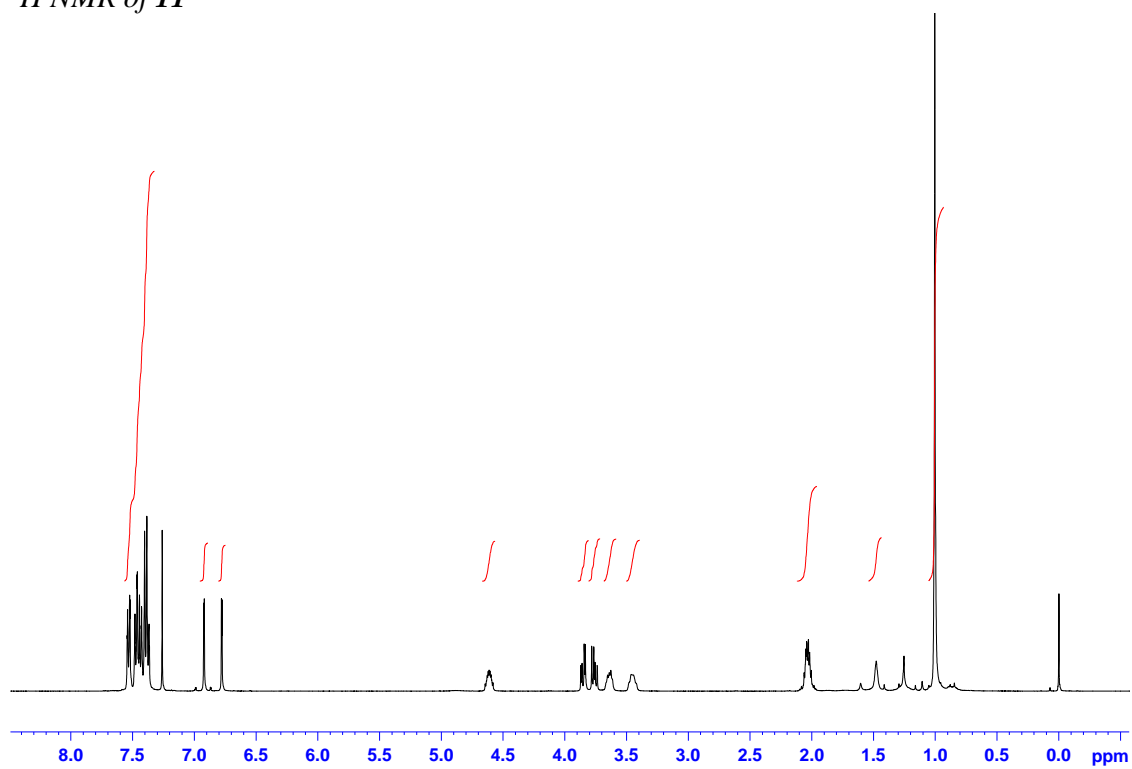

$^{13}\text{C NMR}$  of **11**

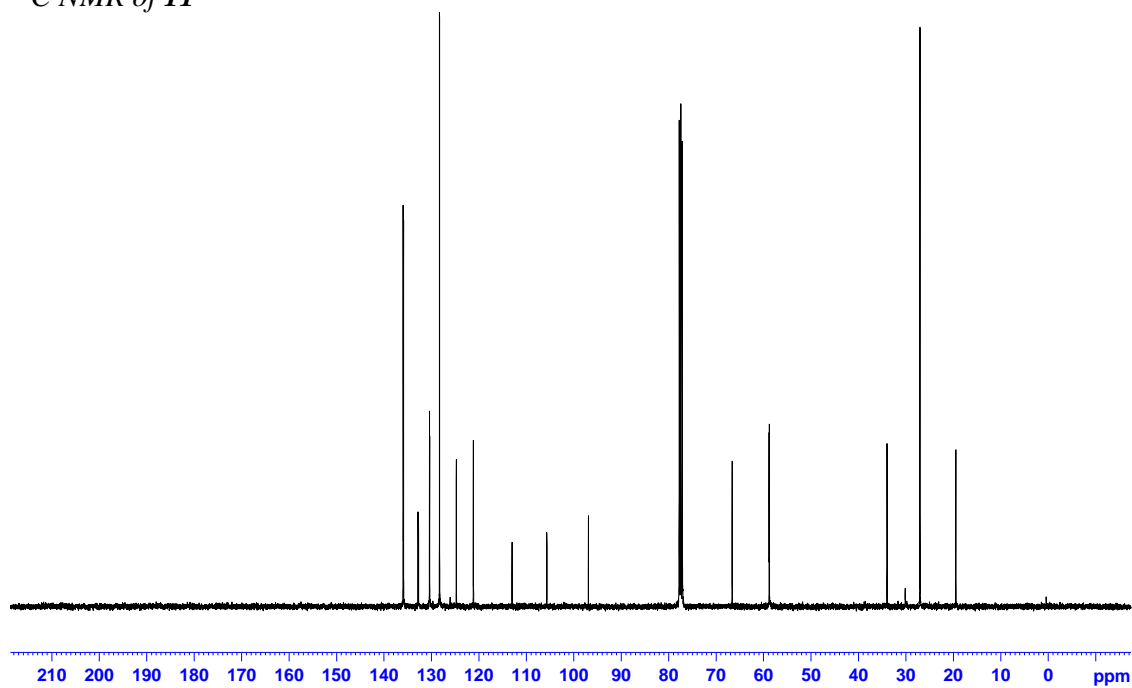

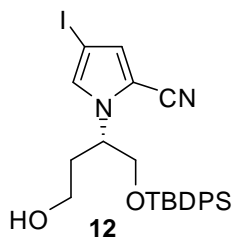

**Light Yellow Oil**

$[\alpha]_D^{21} -19.0$  (c 1, CH<sub>3</sub>OH)

**<sup>1</sup>H NMR (400 MHz, CDCl<sub>3</sub>)** δ 7.53-7.35 (m, 10H), 6.98 (d, *J* = 2.0 Hz, 1H), 6.86 (d, *J* = 1.6 Hz, 1H), 4.64-4.58 (m, 1H), 3.84 (dd, *J* = 10.8, 3.6 Hz, 1H), 3.77 (dd, *J* = 10.8, 6.8 Hz, 1H), 3.65-3.60 (m, 1H), 3.47-3.41 (m, 1H), 2.06-2.01 (m, 2H), 1.53 (s, 1H), 1.00 (s, 9H)

**<sup>13</sup>C NMR (100 MHz, CDCl<sub>3</sub>)** δ 135.5, 135.4, 132.4, 132.3, 129.9, 129.9, 129.2, 127.8, 127.8, 125.6, 112.3, 106.4, 66.2, 59.9, 58.3, 58.2, 33.6, 26.6, 19.0

**FTIR (neat)** 3447, 3071, 2930, 2857, 2222, 1589, 1460, 1427, 1310, 1114, 758, 702, 504 cm<sup>-1</sup>

**HRMS (EI)** calcd for [M]<sup>+</sup> C<sub>25</sub>H<sub>28</sub>N<sub>2</sub>O<sub>2</sub>SiI 543.0965, found 543.0968

**HPLC Condition to determine enantiomeric excess:**

Chiral column: Chiralpak AD-H (250 x 4.6 mm)

Mobile Phase (95/5 = Hexane/IPA)

Flow Rate (1.0 mL/min), Detection Wavelength (254 nm)

Retention Time: 9.4 min (major isomer), 10.9 min (minor isomer)

### Racemate of **12**

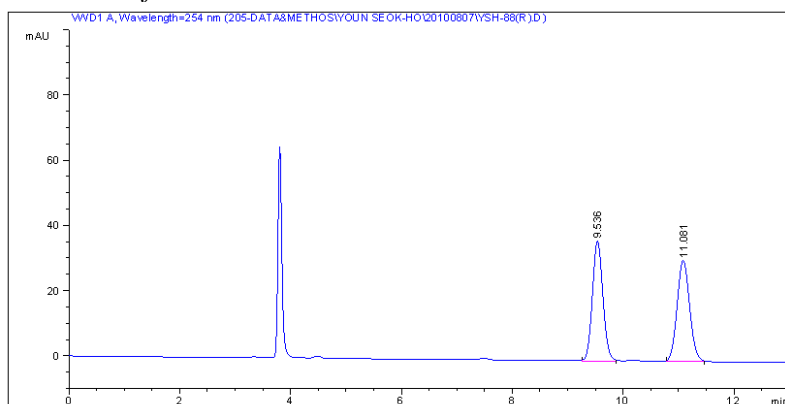

=====  
Area Percent Report  
=====

Sorted By : Signal  
Multiplier : 1.0000  
Dilution : 1.0000  
Use Multiplier & Dilution Factor with ISTDs

Signal 1: VWD1 A, Wavelength=254 nm

| Peak # | RetTime [min] | Type | Width [min] | Area mAU *s | Height [mAU] | Area %  |
|--------|---------------|------|-------------|-------------|--------------|---------|
| 1      | 9.536         | MM   | 0.2220      | 491.37085   | 36.88931     | 50.3232 |
| 2      | 11.081        | MM   | 0.2606      | 485.05893   | 31.02228     | 49.6768 |

### Enantiomeric excess of **12**: 93%

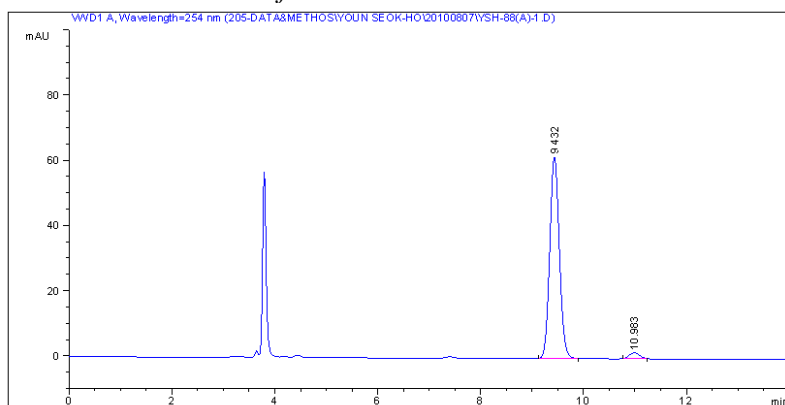

=====  
Area Percent Report  
=====

Sorted By : Signal  
Multiplier : 1.0000  
Dilution : 1.0000  
Use Multiplier & Dilution Factor with ISTDs

Signal 1: VWD1 A, Wavelength=254 nm

| Peak # | RetTime [min] | Type | Width [min] | Area mAU *s | Height [mAU] | Area %  |
|--------|---------------|------|-------------|-------------|--------------|---------|
| 1      | 9.432         | MM   | 0.2170      | 806.82196   | 61.97528     | 96.5700 |
| 2      | 10.983        | MM   | 0.2469      | 28.65729    | 1.93454      | 3.4300  |

$^1\text{H NMR}$  of **12**

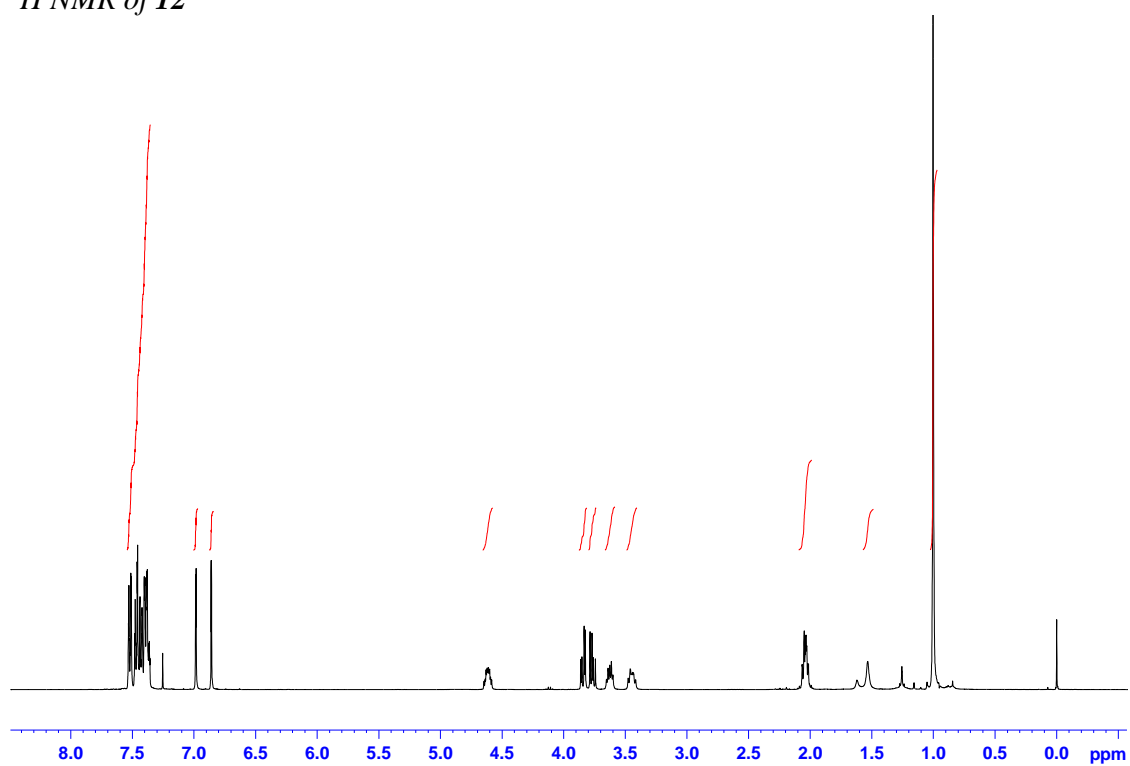

$^{13}\text{C NMR}$  of **12**

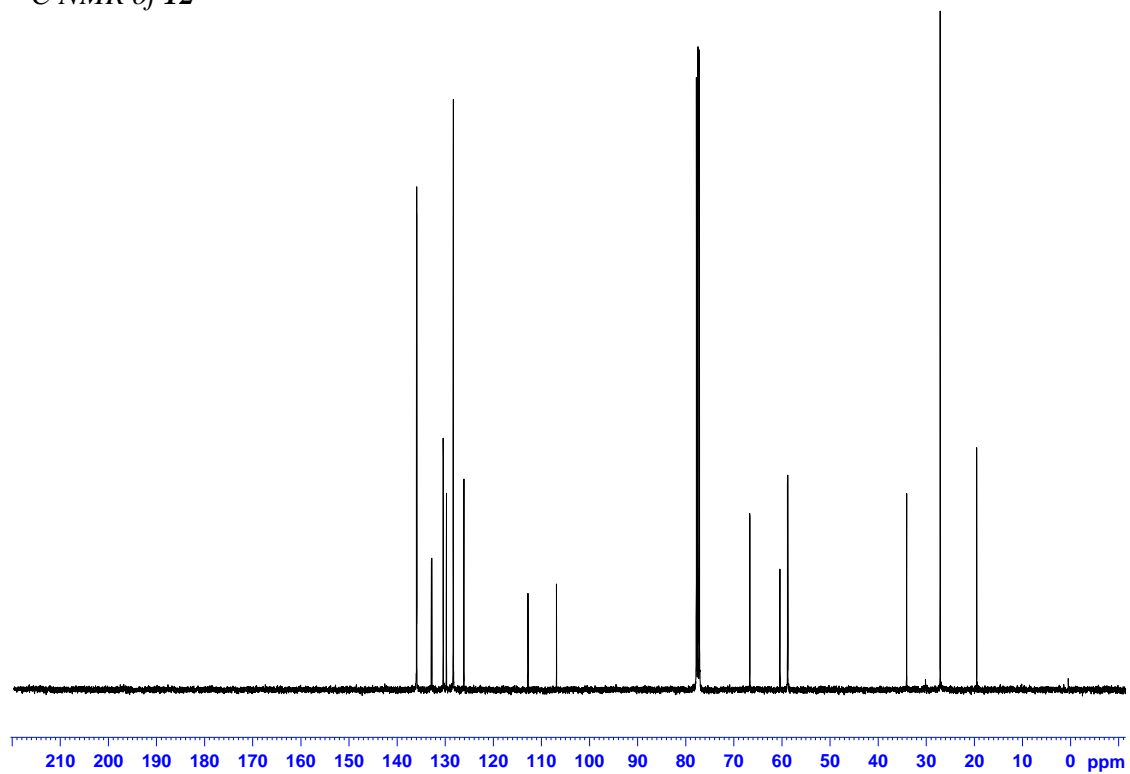

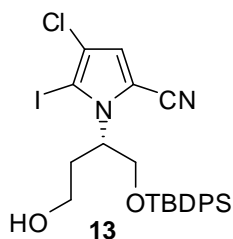

**Colorless Oil**

$[\alpha]_D^{21} -22.5$  (c 1, CH<sub>3</sub>OH)

**<sup>1</sup>H NMR (400 MHz, CDCl<sub>3</sub>)** δ 7.59-7.57 (m, 2H), 7.49-7.34 (m, 8H), 6.99 (s, 1H), 4.99-4.92 (m, 1H), 4.14 (dd, *J* = 10.8, 9.6 Hz, 1H), 3.89 (dd, *J* = 11.2, 4.8 Hz, 1H), 3.70-3.63 (m, 1H), 3.44-3.36 (m, 1H), 2.36-2.27 (m, 1H), 2.09-2.00 (m, 1H), 1.42 (s, 1H), 0.96 (s, 9H)

**<sup>13</sup>C NMR (100 MHz, CDCl<sub>3</sub>)** δ 135.4, 132.6, 132.2, 129.9, 129.8, 127.7, 124.3, 112.6, 106.2, 104.4, 89.4, 65.1, 63.4, 58.2, 32.5, 26.5, 18.9

**FTIR (neat)** 3448, 3071, 2930, 2857, 2219, 1427, 1306, 1113, 741, 702, 504 cm<sup>-1</sup>

**HRMS (EI)** calcd for [M]<sup>+</sup> C<sub>25</sub>H<sub>28</sub>ClN<sub>2</sub>O<sub>2</sub>Si 578.0653, found 578.0648

**HPLC Condition to determine enantiomeric excess:**

Chiral column: Chiralpak AD-H (250 x 4.6 mm)

Mobile Phase (95/5 = Hexane/IPA)

Flow Rate (0.9 mL/min), Detection Wavelength (254 nm)

Retention Time: 8.0 min (minor isomer), 10.2 min (major isomer)

### Racemate of **13**

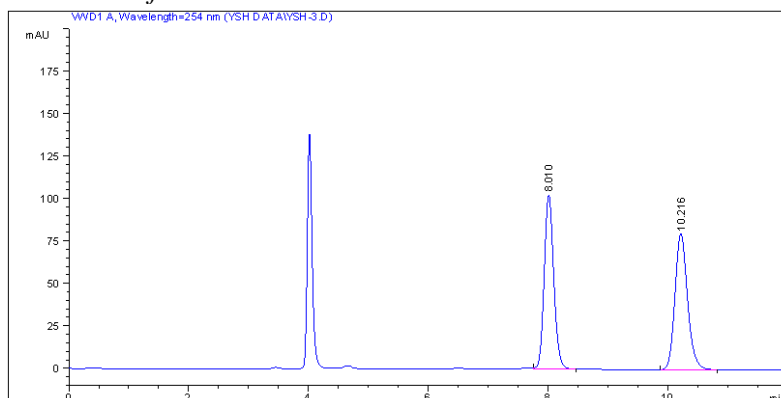

```
=====  
Area Percent Report  
=====
```

Sorted By : Signal  
Multiplier : 1.0000  
Dilution : 1.0000  
Use Multiplier & Dilution Factor with ISTDs

Signal 1: VMD1 A, Wavelength=254 nm

| Peak # | RetTime [min] | Type | Width [min] | Area mAU *s | Height [mAU] | Area %  |
|--------|---------------|------|-------------|-------------|--------------|---------|
| 1      | 8.010         | VB   | 0.1696      | 1133.12988  | 102.61249    | 49.2445 |
| 2      | 10.216        | BB   | 0.2239      | 1167.89673  | 80.13323     | 50.7555 |

Totals : 2301.02661 182.74572

### Enantiomeric excess of **13**: 93%

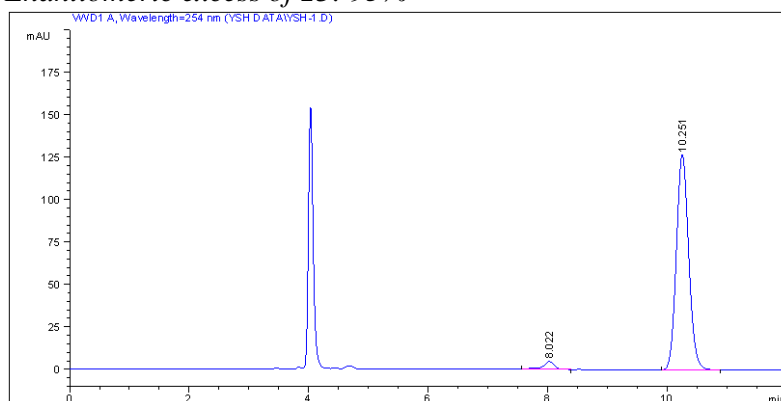

```
=====  
Area Percent Report  
=====
```

Sorted By : Signal  
Multiplier : 1.0000  
Dilution : 1.0000  
Use Multiplier & Dilution Factor with ISTDs

Signal 1: VMD1 A, Wavelength=254 nm

| Peak # | RetTime [min] | Type | Width [min] | Area mAU *s | Height [mAU] | Area %  |
|--------|---------------|------|-------------|-------------|--------------|---------|
| 1      | 8.022         | BB   | 0.2031      | 64.41565    | 4.63057      | 3.4199  |
| 2      | 10.251        | BB   | 0.2213      | 1819.13977  | 126.79105    | 96.5801 |

Totals : 1883.55542 131.42163

$^1\text{H NMR}$  of **13**

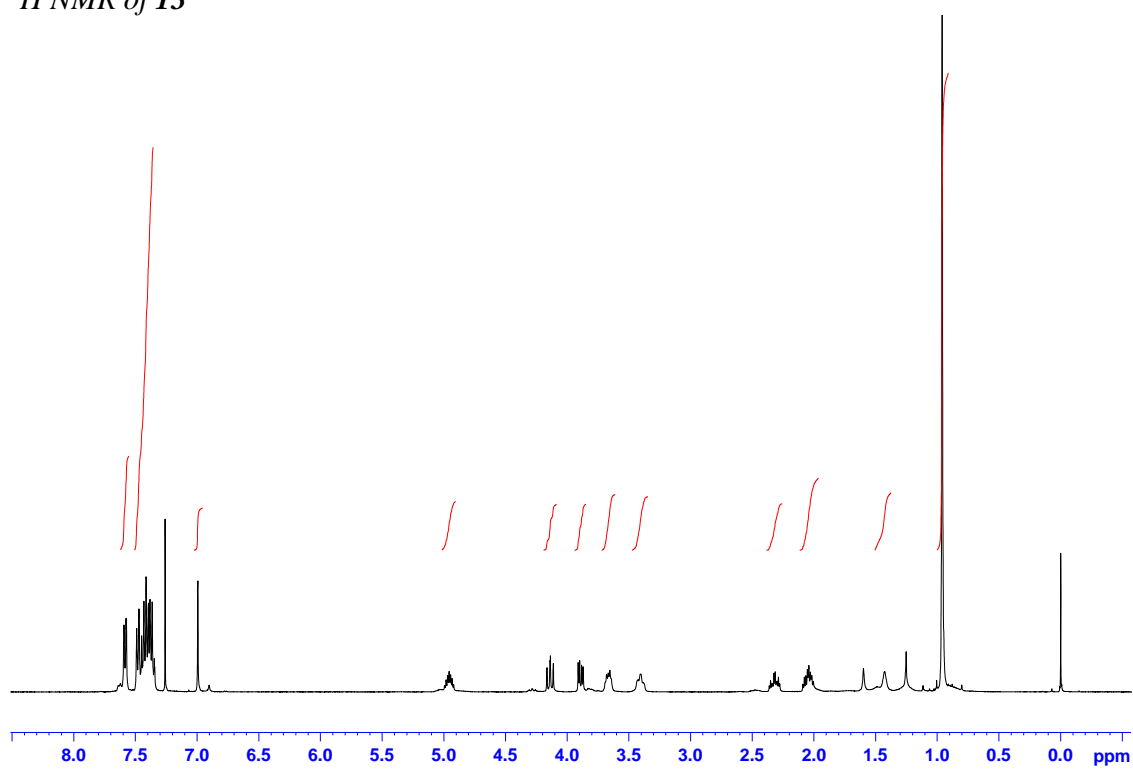

$^{13}\text{C NMR}$  of **13**

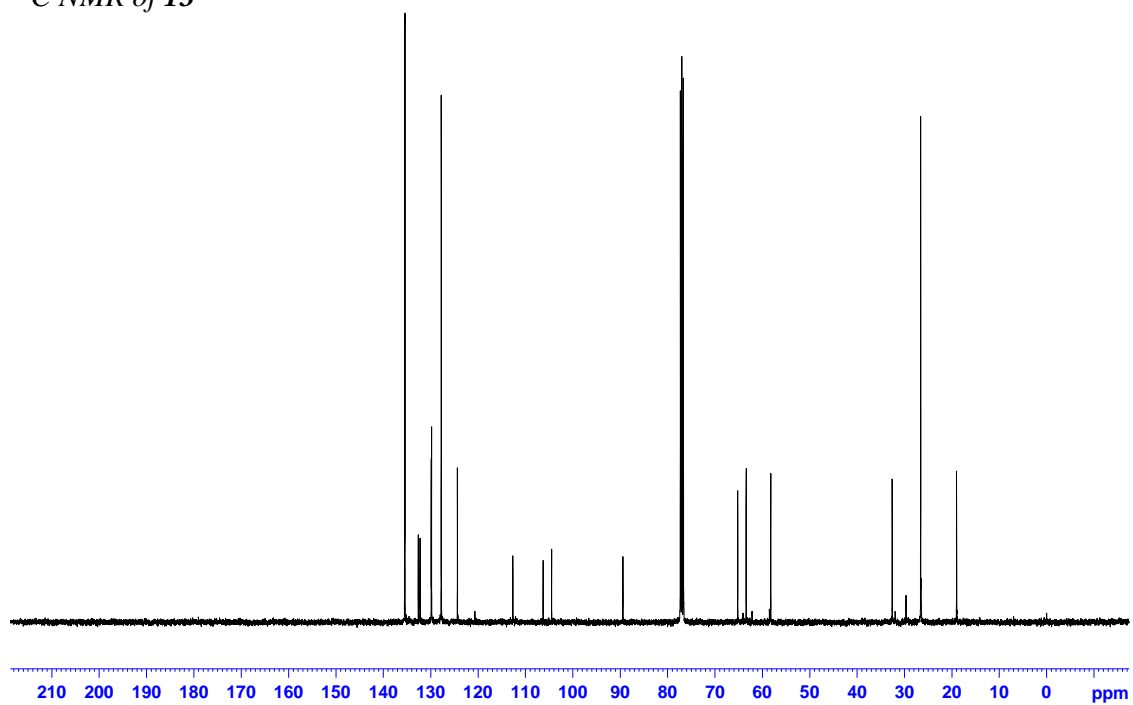



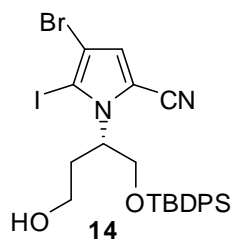

**Yellow Oil**

$[\alpha]_D^{21} -44.8$  (c 1, CH<sub>3</sub>OH)

**<sup>1</sup>H NMR (400 MHz, CDCl<sub>3</sub>)** δ 7.59-7.57 (m, 2H), 7.49-7.34 (m, 8H), 6.99 (s, 1H), 4.98-4.92 (m, 1H), 4.14 (dd, *J* = 10.8, 9.6 Hz, 1H), 3.89 (dd, *J* = 11.2, 4.8 Hz, 1H), 3.68-3.63 (m, 1H), 3.40 (dt, *J* = 9.6, 4.0 Hz, 1H), 2.35-2.27 (m, 1H), 2.08-2.00 (m, 1H), 1.47 (s, 1H), 0.96 (s, 9H)

**<sup>13</sup>C NMR (100 MHz, CDCl<sub>3</sub>)** δ 135.5, 132.6, 132.3, 129.9, 129.8, 127.8, 124.4, 112.6, 106.3, 104.5, 89.3, 65.2, 63.4, 58.3, 32.6, 26.5, 19.0

**FTIR (neat)** 3456, 3071, 2930, 2219, 1427, 1311, 1114, 758, 702, 504 cm<sup>-1</sup>

**HRMS (EI)** calcd for [M]<sup>+</sup> C<sub>25</sub>H<sub>28</sub>BrN<sub>2</sub>O<sub>2</sub>Si 622.0148, found 622.0153

**HPLC Condition to determine enantiomeric excess:**

Chiral column: Chiralpak AD-H (250 x 4.6 mm)

Mobile Phase (95/5 = Hexane/IPA)

Flow Rate (1.0 mL/min), Detection Wavelength (254 nm)

Retention Time: 7.8 min (minor isomer), 10.1 min (major isomer)

### Racemate of **14**

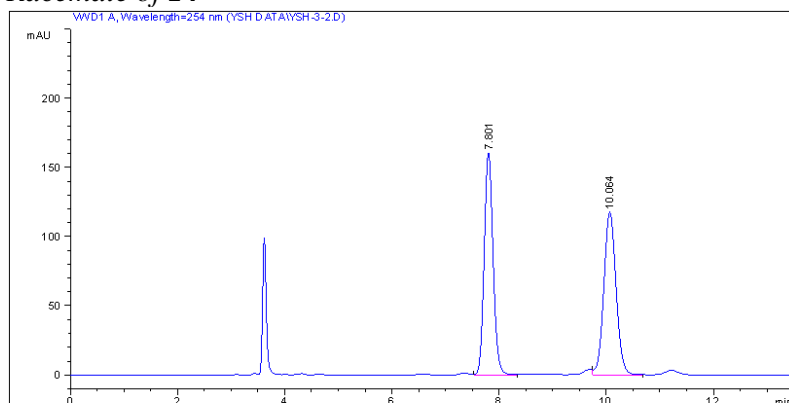

=====  
Area Percent Report  
=====

Sorted By : Signal  
Multiplier : 1.0000  
Dilution : 1.0000  
Use Multiplier & Dilution Factor with ISTDs

Signal 1: VWD1 A, Wavelength=254 nm

| Peak # | RetTime [min] | Type | Width [min] | Area mAU *s | Height [mAU] | Area %  |
|--------|---------------|------|-------------|-------------|--------------|---------|
| 1      | 7.801         | VB   | 0.1779      | 1848.33374  | 160.63713    | 49.7617 |
| 2      | 10.064        | VB   | 0.2463      | 1866.03979  | 117.60342    | 50.2383 |

Totals : 3714.37354 278.24055

### Enantiomeric excess of **14**: 94%

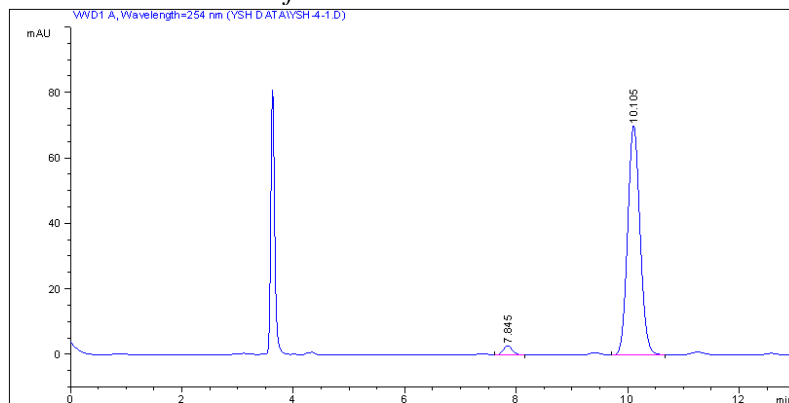

=====  
Area Percent Report  
=====

Sorted By : Signal  
Multiplier : 1.0000  
Dilution : 1.0000  
Use Multiplier & Dilution Factor with ISTDs

Signal 1: VWD1 A, Wavelength=254 nm

| Peak # | RetTime [min] | Type | Width [min] | Area mAU *s | Height [mAU] | Area %  |
|--------|---------------|------|-------------|-------------|--------------|---------|
| 1      | 7.845         | VB   | 0.1788      | 32.74894    | 2.82841      | 2.9481  |
| 2      | 10.105        | VB   | 0.2393      | 1078.10925  | 70.02004     | 97.0519 |

Totals : 1110.85819 72.84845

$^1\text{H NMR}$  of **14**

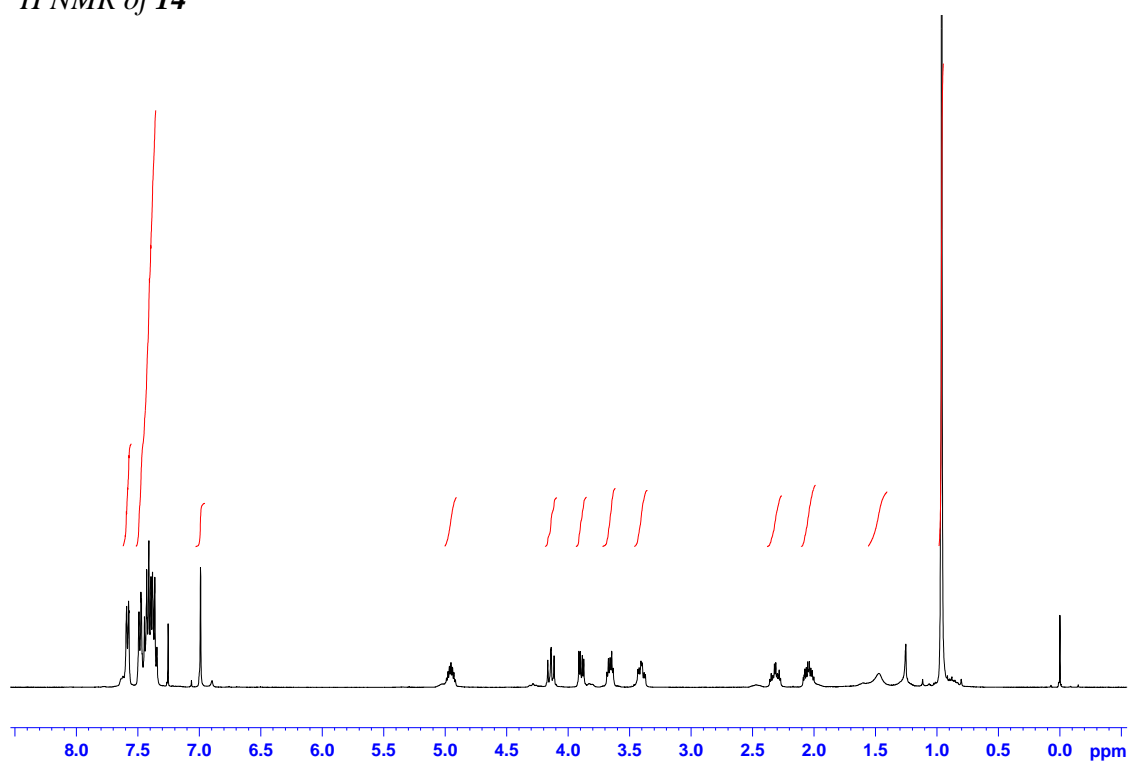

$^{13}\text{C NMR}$  of **14**

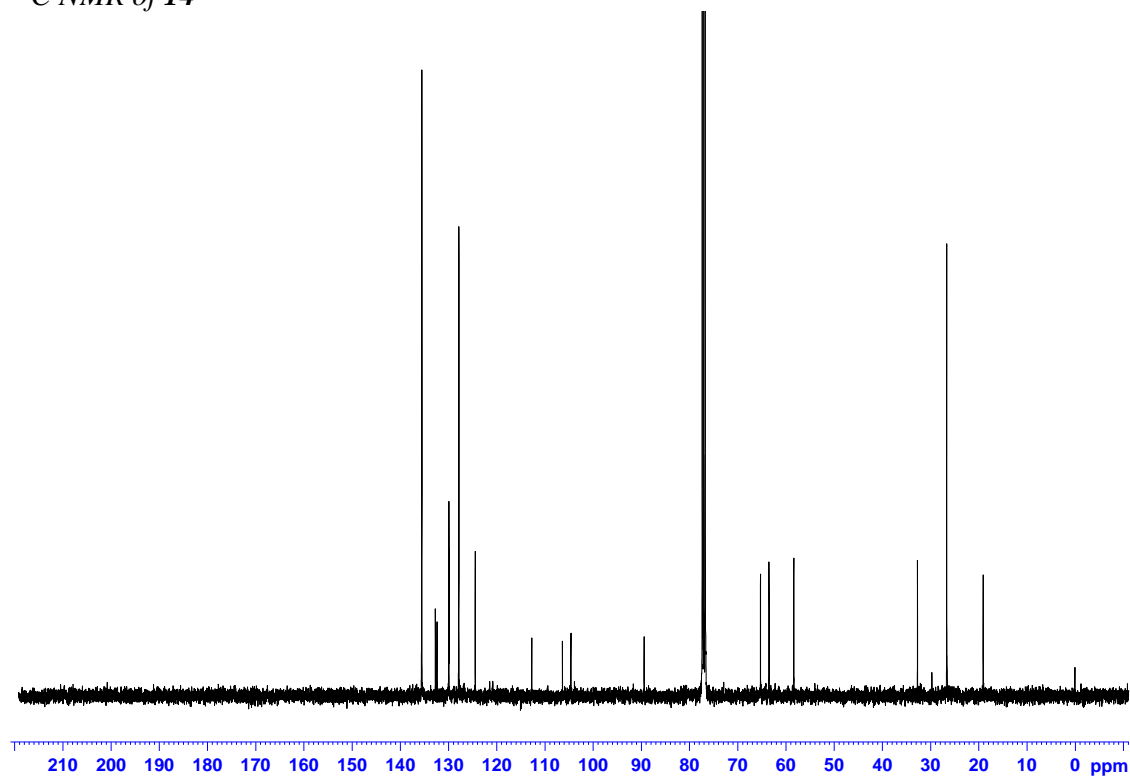

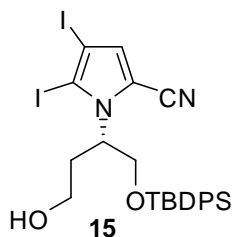

**Light Yellow Oil**

$[\alpha]_D^{21} -36.0$  (c 1, CH<sub>3</sub>OH)

**<sup>1</sup>H NMR (400 MHz, CDCl<sub>3</sub>)** δ 7.58-7.56 (m, 2H), 7.48-7.34 (m, 8H), 7.06 (s, 1H), 5.03-4.96 (m, 1H), 4.12 (dd, *J* = 10.8, 9.6 Hz, 1H), 3.88 (dd, *J* = 10.8, 4.8 Hz, 1H), 3.70-3.62 (m, 1H), 3.45-3.37 (m, 1H), 2.35-2.27 (m, 1H), 2.08-1.99 (m, 1H), 1.40 (s, 1H), 0.96 (s, 9H)

**<sup>13</sup>C NMR (100 MHz, CDCl<sub>3</sub>)** δ 135.4, 132.6, 132.3, 129.9, 129.8, 129.7, 127.8, 127.7, 112.3, 105.5, 95.5, 77.2, 75.5, 65.2, 64.3, 58.2, 32.7, 26.5, 19.0

**FTIR (neat)** 3452, 3071, 2930, 2218, 1427, 1362, 1298, 1113, 757, 702, 504 cm<sup>-1</sup>

**HRMS (EI)** calcd for [M]<sup>+</sup> C<sub>25</sub>H<sub>28</sub>N<sub>2</sub>O<sub>2</sub>Si<sub>2</sub> 670.0010, found 670.0005

**HPLC Condition to determine enantiomeric excess:**

Chiral column: Chiralpak AD-H (250 x 4.6 mm)

Mobile Phase (95/5 = Hexane/IPA)

Flow Rate (0.9 mL/min), Detection Wavelength (254 nm)

Retention Time: 16.6 min (major isomer), 17.7 min (minor isomer)

### Racemate of 15

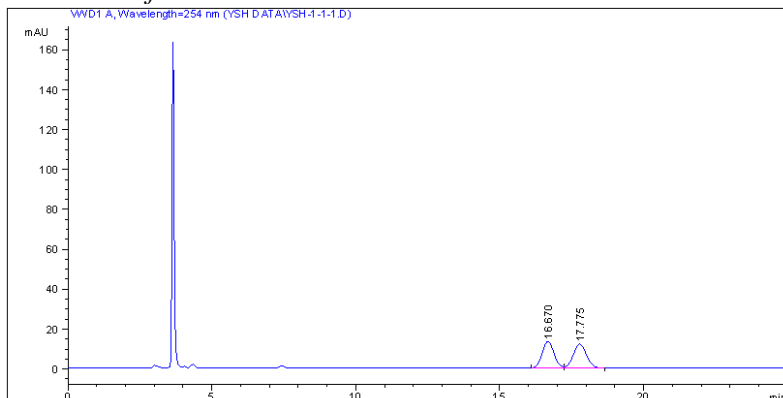

=====  
Area Percent Report  
=====

Sorted By : Signal  
Multiplier : 1.0000  
Dilution : 1.0000  
Use Multiplier & Dilution Factor with ISTDs

Signal 1: VMD1 A, Wavelength=254 nm

| Peak # | RetTime [min] | Type | Width [min] | Area mAU *s | Height [mAU] | Area %  |
|--------|---------------|------|-------------|-------------|--------------|---------|
| 1      | 16.670        | BV   | 0.4455      | 382.52658   | 13.38793     | 49.9451 |
| 2      | 17.775        | VB   | 0.5043      | 383.36755   | 11.98154     | 50.0549 |

Totals : 765.89413 25.36947

### Enantiomeric excess of 15: 92%

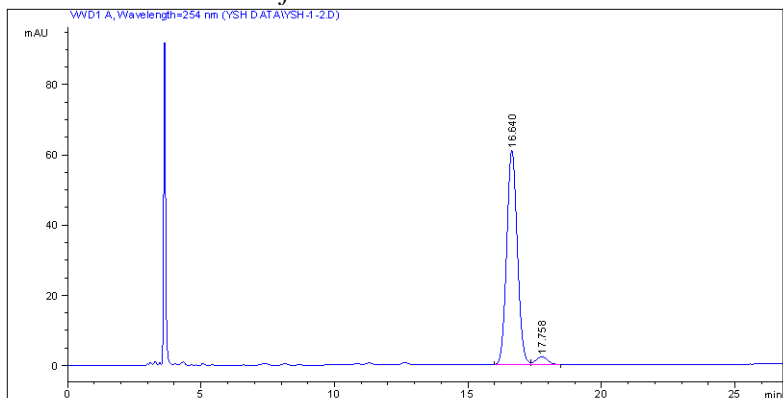

=====  
Area Percent Report  
=====

Sorted By : Signal  
Multiplier : 1.0000  
Dilution : 1.0000  
Use Multiplier & Dilution Factor with ISTDs

Signal 1: VMD1 A, Wavelength=254 nm

| Peak # | RetTime [min] | Type | Width [min] | Area mAU *s | Height [mAU] | Area %  |
|--------|---------------|------|-------------|-------------|--------------|---------|
| 1      | 16.640        | BV   | 0.4305      | 1688.97925  | 61.05460     | 96.0482 |
| 2      | 17.758        | VB   | 0.4695      | 69.49210    | 2.23233      | 3.9518  |

Totals : 1758.47135 63.28693

$^1\text{H NMR}$  of **15**

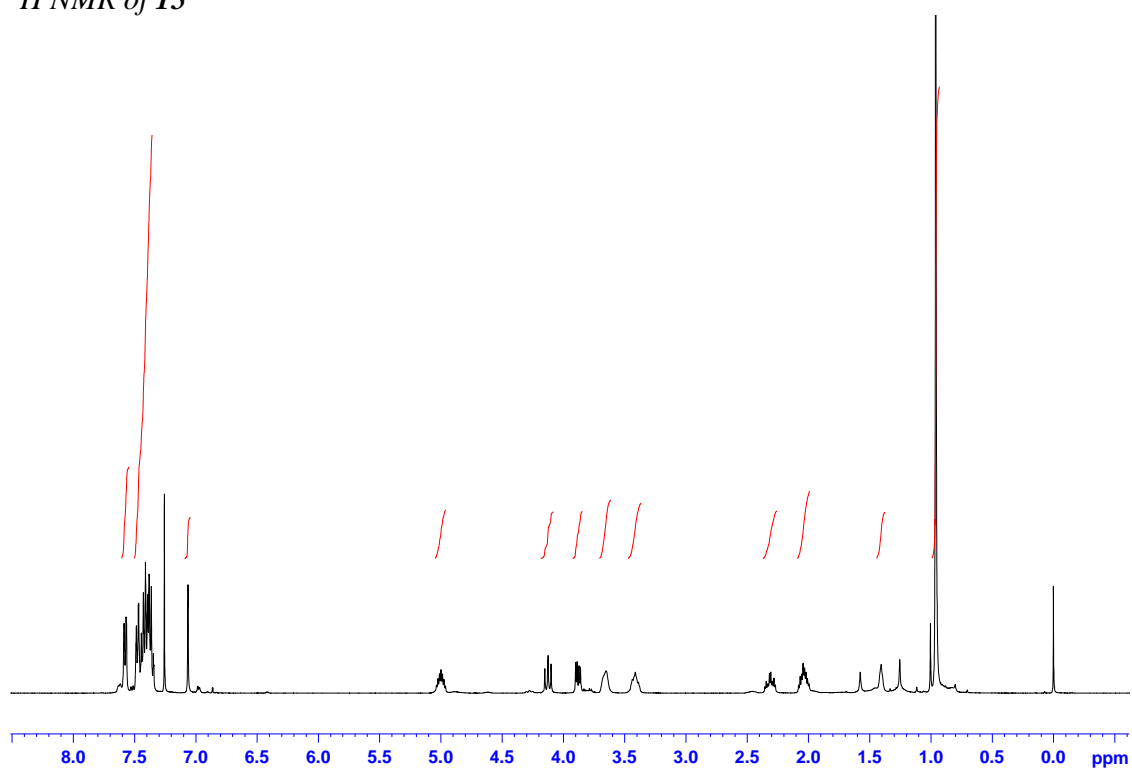

$^{13}\text{C NMR}$  of **15**

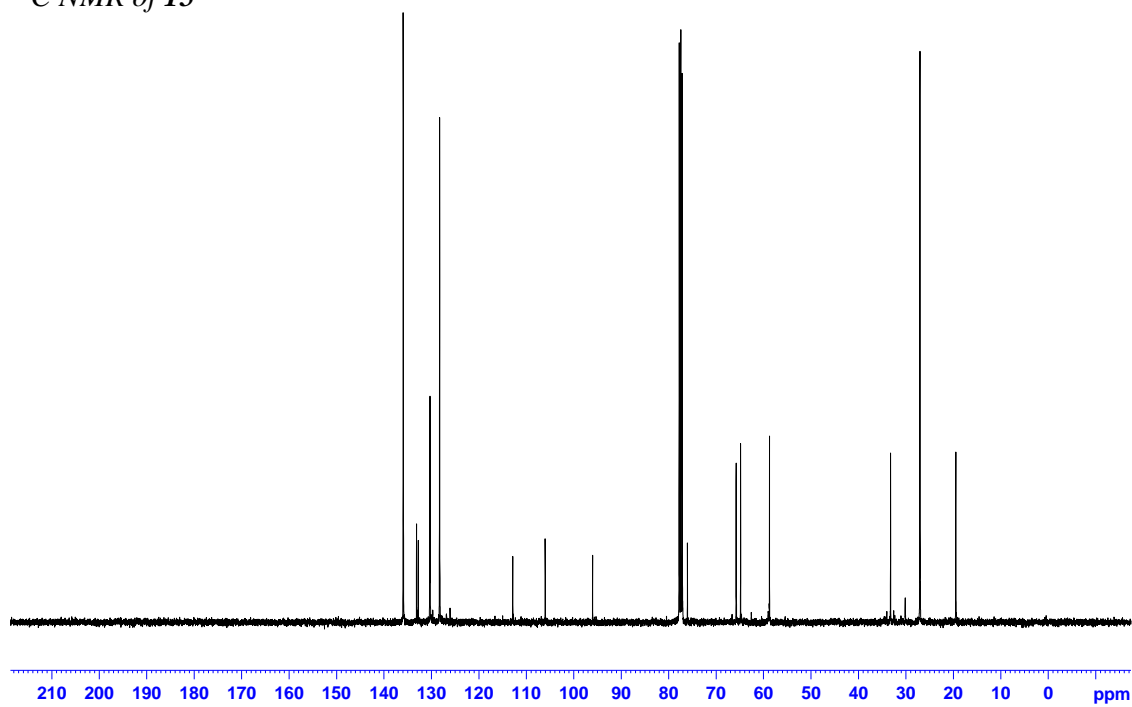

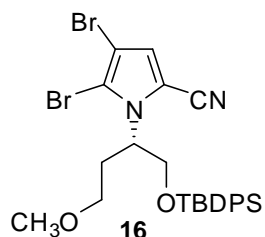

Iodomethane (6.2 mL, 0.2 M) and silver oxide (431 mg, 1.86 mmol) was added to a solution of the conjugate product **6** (715 mg, 1.24 mmol) in acetonitrile (6.2 mL, 0.2 M) at rt. The mixture was allowed to stir at reflux for 12 h. The solids were removed by filtration and the solvents removed. The residue was purified by flash chromatography (SiO<sub>2</sub>: 10% EtOAc in hexanes) to provide the ether **16** in 98% yield (717 mg, 1.22 mmol) as a colorless oil.

#### Colorless Oil

$[\alpha]_D^{20} +30.9$  (c 1, CH<sub>3</sub>OH)

**<sup>1</sup>H NMR (400 MHz, CDCl<sub>3</sub>)** δ 7.58-7.56 (m, 2H), 7.49-7.34 (m, 8H), 6.92 (s, 1H), 5.01-4.96 (m, 1H), 4.11 (t, *J* = 10.0 Hz, 1H), 3.87 (dd, *J* = 10.8, 4.4 Hz, 1H), 3.40-3.35 (m, 1H), 3.25 (s, 3H), 3.04 (dt, *J* = 9.6, 4.0 Hz, 1H), 2.31-2.25 (m, 1H), 2.08-2.02 (m, 1H), 0.95 (s, 9H)

**<sup>13</sup>C NMR (100 MHz, CDCl<sub>3</sub>)** δ 135.4, 132.7, 132.4, 129.8, 129.8, 127.7, 123.7, 114.3, 112.8, 102.4, 98.9, 67.8, 64.9, 60.6, 58.6, 30.1, 26.5, 18.9

**FTIR (neat)** 3071, 2930, 2857, 2221, 1415, 1313, 1114, 798, 702, 504 cm<sup>-1</sup>

**HRMS (EI)** calcd for [M]<sup>+</sup> C<sub>26</sub>H<sub>30</sub>Br<sub>2</sub>N<sub>2</sub>O<sub>2</sub>Si 588.0443, found 588.0442

$^1\text{H NMR}$  of **16**

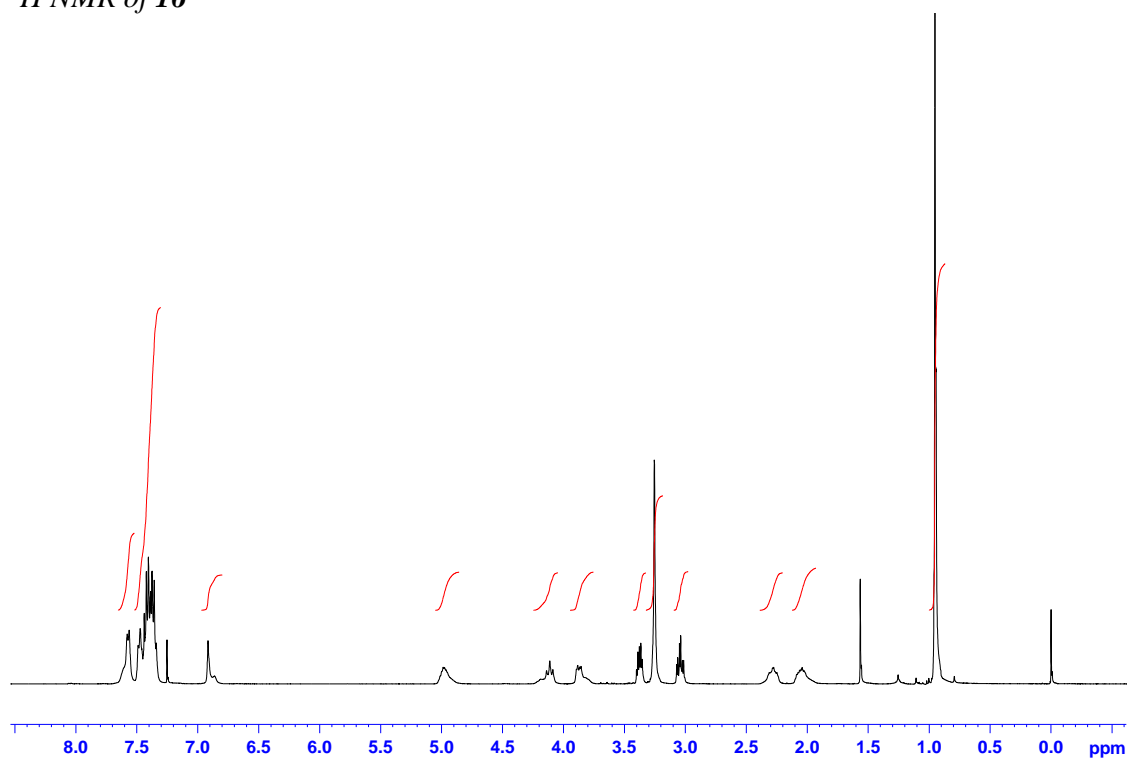

$^{13}\text{C NMR}$  of **16**

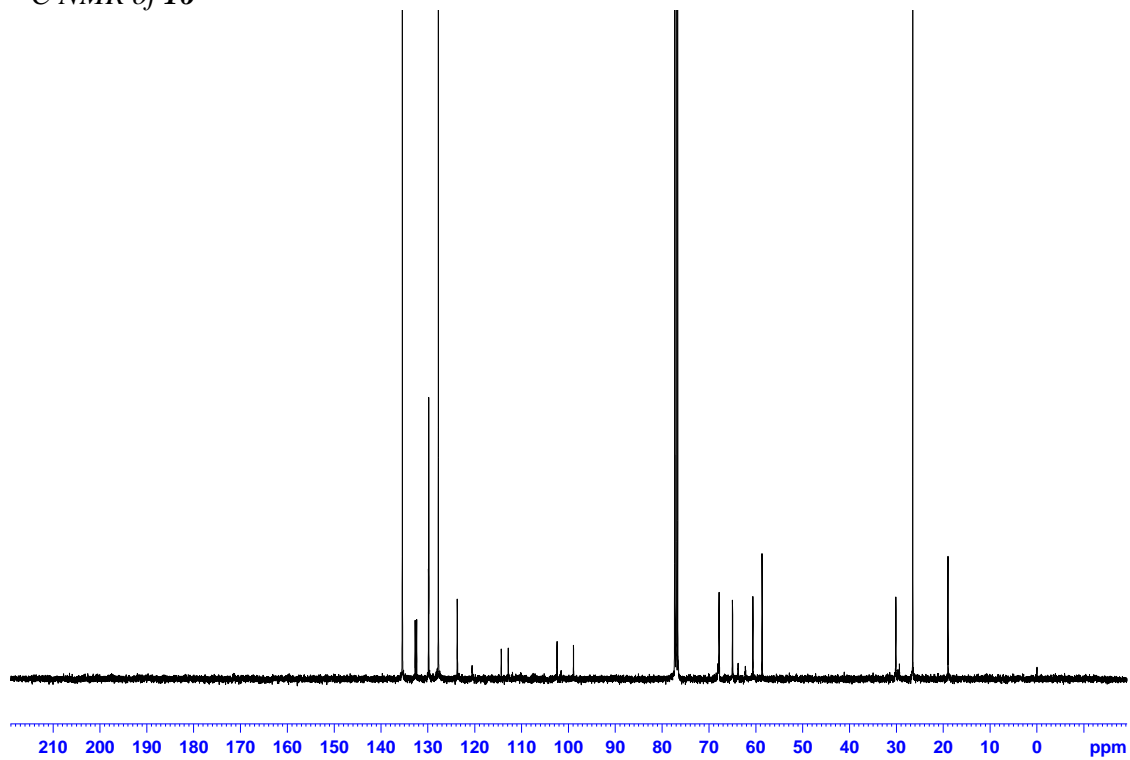



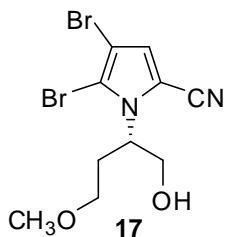

1.25 M HCl solution in methanol (6.4 mL, 8.0 mmol) was added to **16** (236 mg, 0.4 mmol). The mixture was stirred at rt for 12 h, at which point 1.25 M HCl solution in methanol (6.4 mL, 8.0 mmol) was added once more and the mixture was stirred at rt for 48 h. The mixture was evaporated to remove methanol and quenched by saturated NaHCO<sub>3</sub>. The mixture was extracted with ethyl acetate and the organic layer was dried over MgSO<sub>4</sub>. Filtration, concentration, and purification by flash chromatography (SiO<sub>2</sub>: 30% EtOAc in hexanes) provided the alcohol **17** in 90% yield (126 mg, 0.358 mmol) as a white solid.

#### **White Solid**

**M.P.** 63~65 °C

**[α]<sub>D</sub><sup>21</sup> -5.2 (c 1, CH<sub>3</sub>OH)**

**<sup>1</sup>H NMR (400 MHz, CDCl<sub>3</sub>)** δ 6.95 (s, 1H), 4.90-4.84 (m, 1H), 4.19-4.13 (m, 1H), 3.99-3.93 (m, 1H), 3.47-3.42 (m, 1H), 3.29 (s, 3H), 3.10 (dt, *J* = 9.6, 4.0 Hz, 1H), 2.34-2.26 (m, 1H), 2.24-2.15 (m, 1H), 2.05 (t, *J* = 5.6 Hz, 1H)

**<sup>13</sup>C NMR (100 MHz, CDCl<sub>3</sub>)** δ 123.7, 113.9, 112.7, 102.3, 99.5, 67.9, 63.5, 61.0, 58.6, 30.4

**FTIR (neat)** 3449, 3124, 2890, 2226, 1411, 1379, 1313, 1121, 1085, 828 cm<sup>-1</sup>

**HRMS (EI)** calcd for [M]<sup>+</sup> C<sub>10</sub>H<sub>12</sub>Br<sub>2</sub>N<sub>2</sub>O<sub>2</sub> 349.9265, found 349.9263

$^1\text{H NMR}$  of **17**

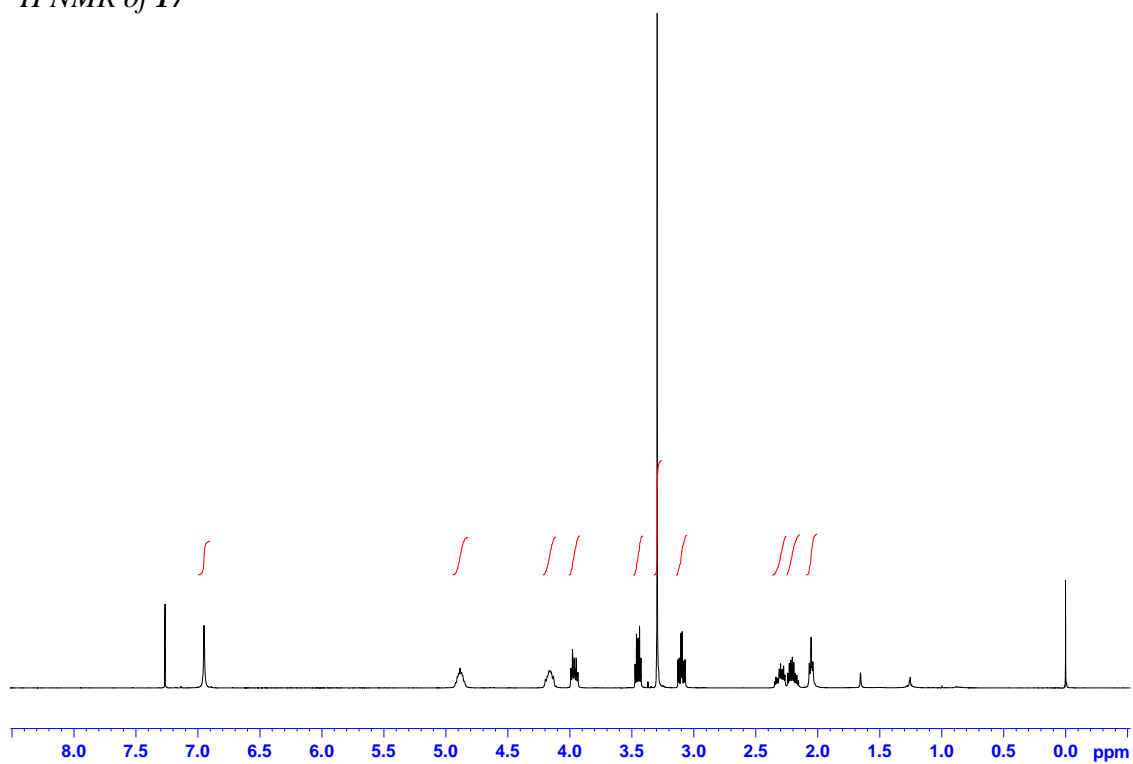

$^{13}\text{C NMR}$  of **17**

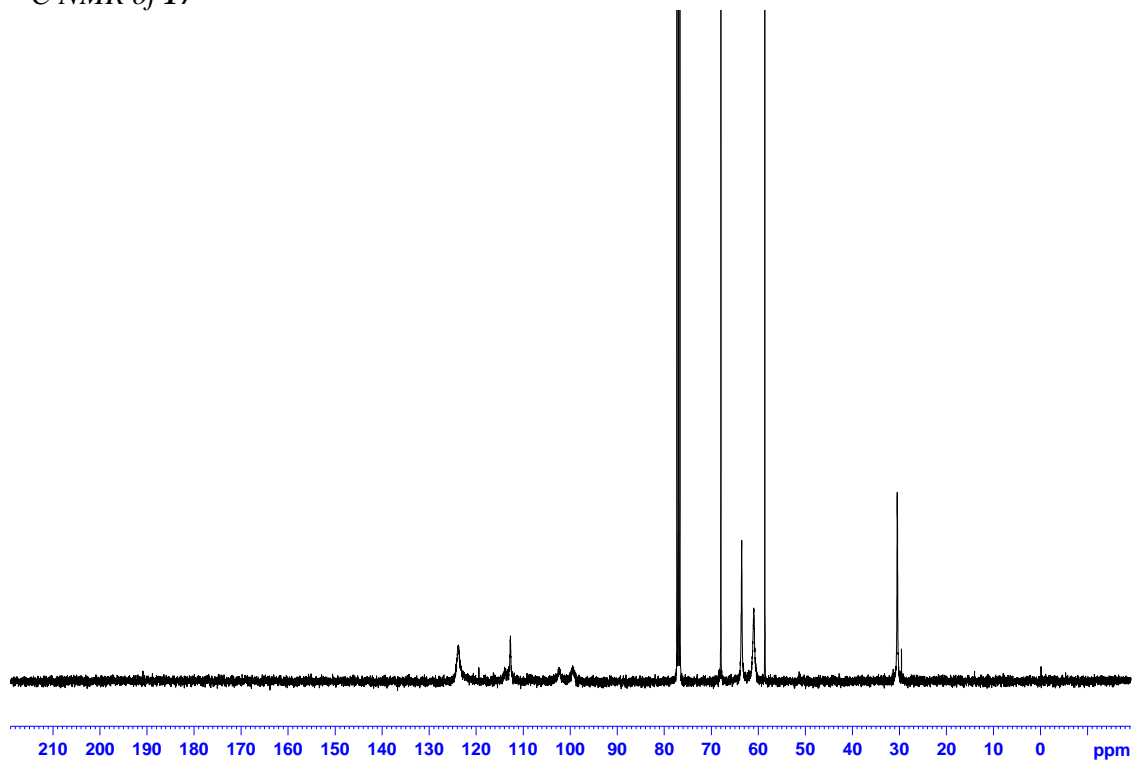

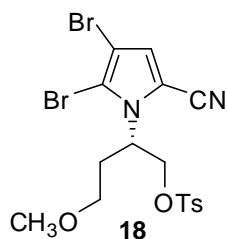

*p*-Toluenesulfonyl chloride (136 mg, 0.713 mmol) was added to a solution of **17** (114 mg, 0.324 mmol) in pyridine (0.32 mL, 1.0 M). The mixture was allowed to stir at rt for 16 h. The mixture was quenched by water and extracted with ethyl acetate. The organic layer was washed with saturated NH<sub>4</sub>Cl and brine, dried over Na<sub>2</sub>SO<sub>4</sub>. Filtration, concentration, and purification by flash chromatography (SiO<sub>2</sub>: 25% EtOAc in hexanes) provided the tosylate **18** in 97% yield (159 mg, 0.314 mmol) as a colorless oil.

#### Colorless Oil

$[\alpha]_D^{20}$  -12.0 (c 1, CH<sub>3</sub>OH)

**<sup>1</sup>H NMR (400 MHz, CDCl<sub>3</sub>)** δ 7.64 (d, *J* = 8.0 Hz, 1H), 7.31 (d, *J* = 8.0 Hz, 1H), 6.74 (s, 1H), 5.11-5.01 (m, 1H), 4.53 (t, *J* = 10.2 Hz, 1H), 4.32 (dd, *J* = 10.2, 4.0 Hz, 1H), 3.41-3.36 (m, 1H), 3.23 (s, 3H), 2.96 (dt, *J* = 9.6, 3.6 Hz, 1H), 2.45 (s, 3H), 2.29-2.20 (m, 1H), 2.16-2.07 (m, 1H)

**<sup>13</sup>C NMR (100 MHz, CDCl<sub>3</sub>)** δ 145.2, 132.0, 129.9, 127.6, 124.0, 113.9, 112.3, 102.1, 99.5, 69.4, 67.2, 58.6, 57.4, 30.3, 21.6

**FTIR (neat)** 3125, 2927, 2877, 2221, 1598, 1367, 1177, 1122, 981, 813, 666, 554 cm<sup>-1</sup>

**HRMS (EI)** calcd for [M]<sup>+</sup> C<sub>17</sub>H<sub>18</sub>Br<sub>2</sub>N<sub>2</sub>O<sub>4</sub>S 503.9354, found 503.9358

$^1\text{H NMR}$  of **18**

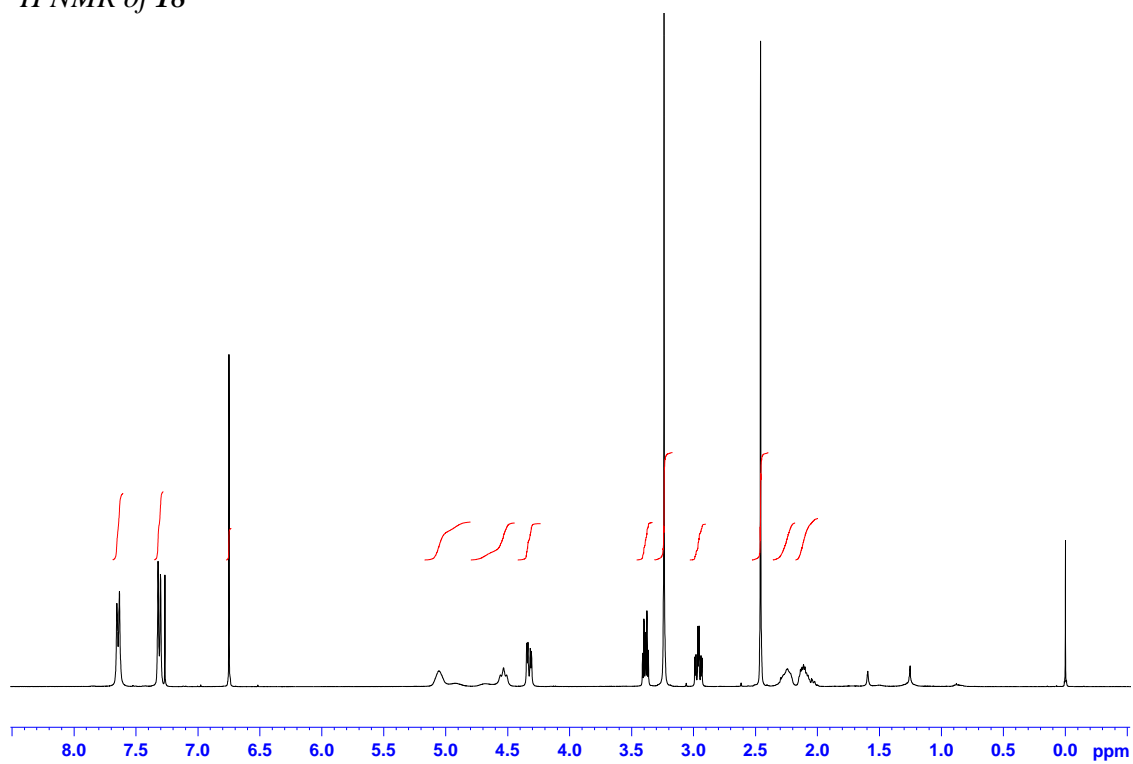

$^{13}\text{C NMR}$  of **18**

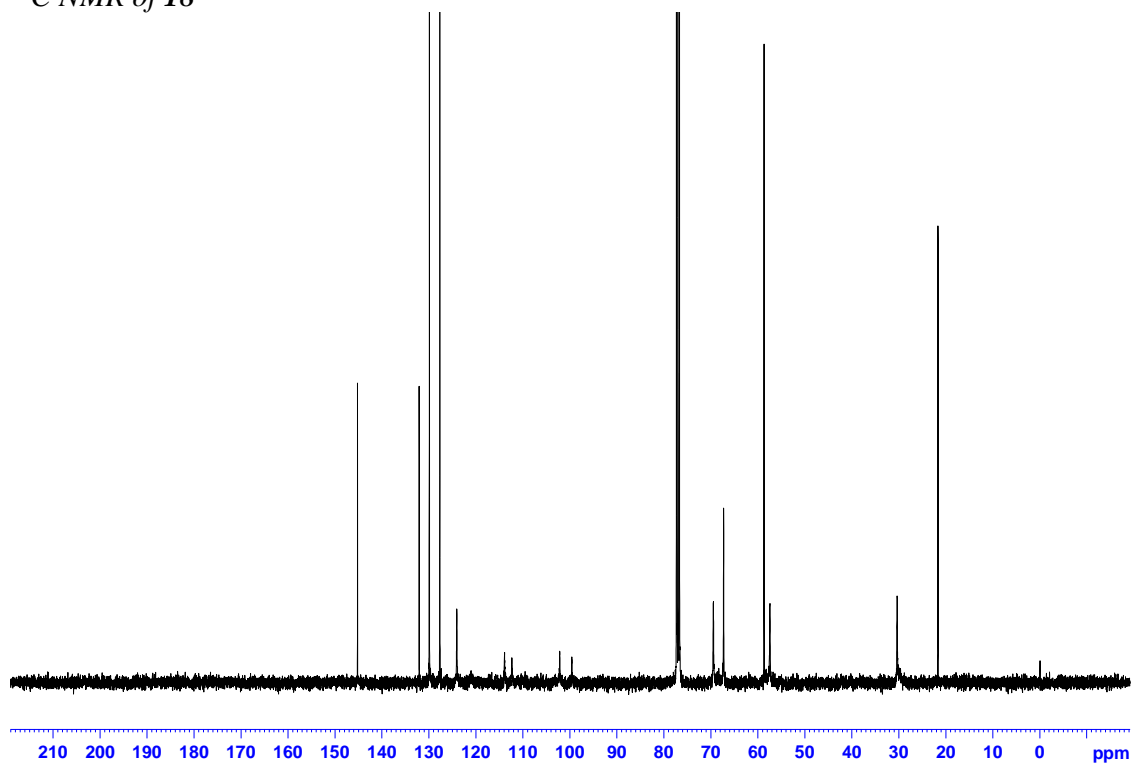

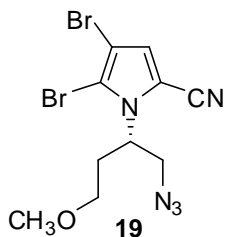

Sodium azide (122 mg, 1.884 mmol) was added to a solution of **18** (159 mg, 0.314 mmol) in dimethyl sulfoxide (3.14 mL, 0.1 M) at rt. The mixture was allowed to stir at 65 °C for 24 h. The mixture was quenched by water and extracted with ethyl acetate. The organic layers was washed with water and brine, dried over Na<sub>2</sub>SO<sub>4</sub>. Filtration, concentration, and purification by flash chromatography (SiO<sub>2</sub>: 20% EtOAc in hexanes) provided the azide **19** in 82% yield (97 mg, 0.257 mmol) as a white solid.

#### White Solid

**M.P.** 45~47 °C

$[\alpha]_D^{21} +4.0$  (c 1, CH<sub>3</sub>OH)

**<sup>1</sup>H NMR (400 MHz, CDCl<sub>3</sub>)** δ 6.99 (s, 1H), 4.97-4.87 (m, 1H), 4.02-3.92 (m, 1H), 3.67 (dd, *J* = 13.2, 5.2 Hz, 1H), 3.46-3.41 (m, 1H), 3.28 (s, 3H), 3.03 (dt, *J* = 10.0, 3.6 Hz, 1H), 2.42-2.32 (m, 1H), 2.20-2.12 (m, 1H)

**<sup>13</sup>C NMR (100 MHz, CDCl<sub>3</sub>)** δ 124.4, 114.0, 112.7, 102.3, 99.7, 67.4, 58.7, 58.2, 53.6, 31.6

**FTIR (neat)** 3101, 2936, 2217, 2101, 1413, 1312, 1275, 1121, 1086, 965, 914 cm<sup>-1</sup>

**HRMS (EI)** calcd for [M]<sup>+</sup> C<sub>10</sub>H<sub>11</sub>Br<sub>2</sub>N<sub>5</sub>O 374.9330, found 374.9328

$^1\text{H NMR}$  of **19**

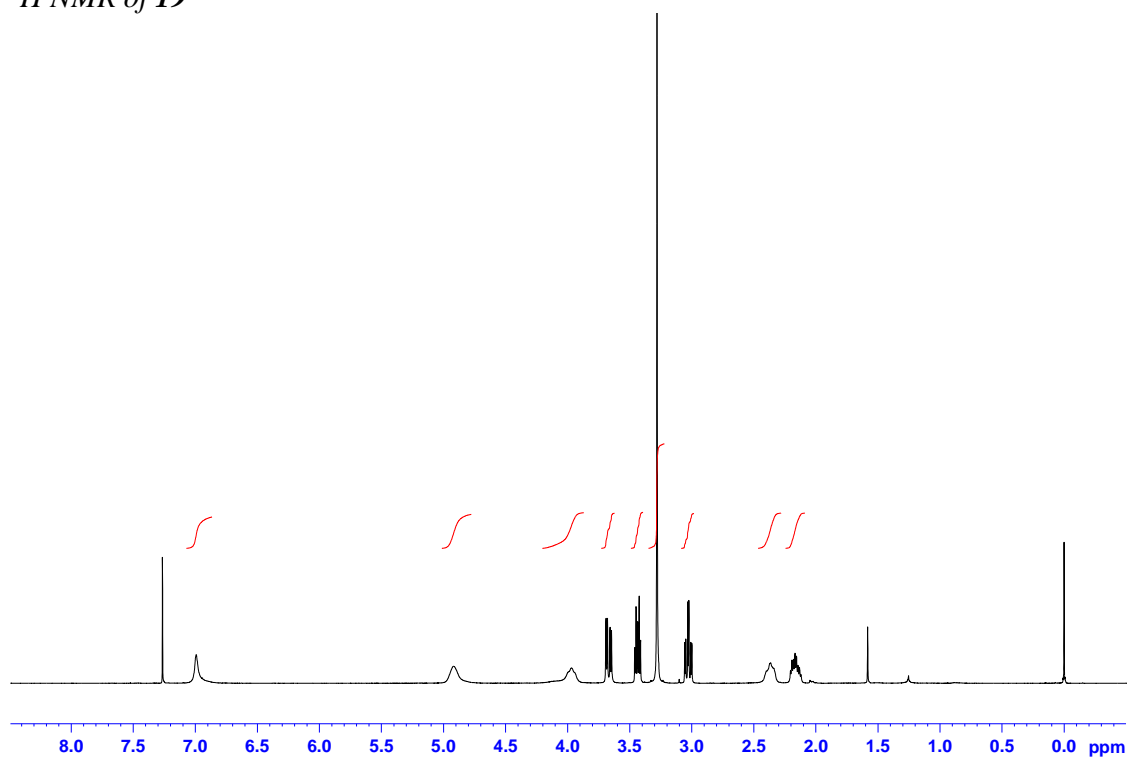

$^{13}\text{C NMR}$  of **19**

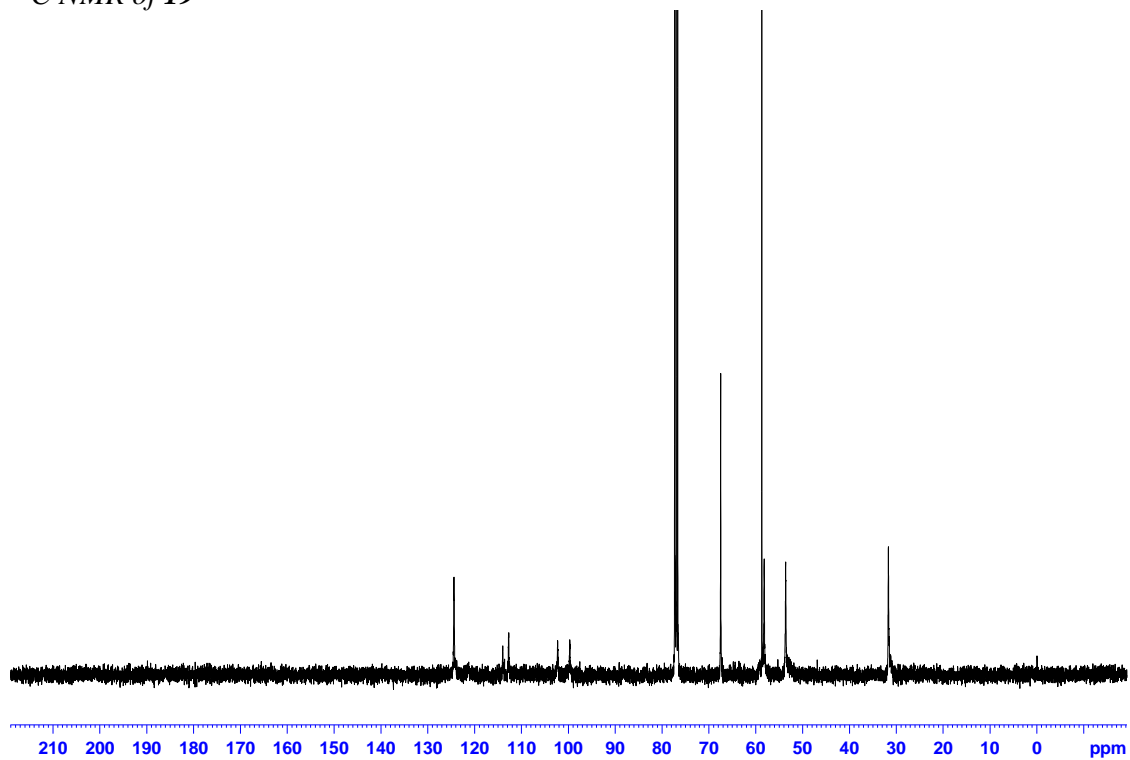

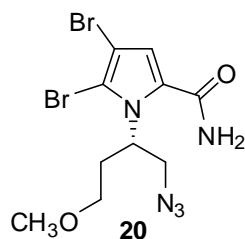

1 N aqueous sodium hydroxide (0.48 mL, 0.48 mmol) and hydrogen peroxide (30 wt. % in H<sub>2</sub>O, 0.48 mL, 0.144 mmol) were added to a solution of **19** (91 mg, 0.241 mmol) in methanol–dichloromethane (10 : 1 v/v, 4.82 mL, 0.05 M). The mixture was allowed to stir at rt for 12 h. The mixture was quenched by saturated Na<sub>2</sub>S<sub>2</sub>O<sub>2</sub> and saturated NH<sub>4</sub>Cl. The mixture was extracted with dichloromethane and water. The organic layer was dried over MgSO<sub>4</sub>. Filtration, concentration, and purification by flash chromatography (SiO<sub>2</sub>: 40% EtOAc in hexanes) provided the azide–amide **20** in 95% yield (91 mg, 0.229 mmol) as a colorless oil.

#### Colorless Oil

$[\alpha]_D^{19} -36.0$  (c 1, CH<sub>3</sub>OH)

#### <sup>1</sup>H NMR (400 MHz, CDCl<sub>3</sub>, mixture of two conformers, major : minor = 57 : 43)

$\delta$  6.82 (s, 0.57H) and 6.73 (s, 0.43H), 6.01-5.73 (m, 2.43H) and 4.99-4.89 (m, 0.57H), 4.36 (t,  $J$  = 11.2 Hz, 0.57H) and 4.10 (t,  $J$  = 11.2 Hz, 0.43H), 3.62 (dd,  $J$  = 12.8, 5.2 Hz, 1H), 3.39-3.32 (m, 1H), 3.25 (s, 3H), 3.24-3.17 (m, 0.43H) and 3.06-2.98 (m, 0.57H), 2.50-2.42 (m, 1H), 2.19-2.06 (m, 1H)

#### <sup>13</sup>C NMR (100 MHz, CDCl<sub>3</sub>, mixture of two conformers)

**Major:**  $\delta$  161.9, 126.6, 117.8, 114.7, 98.9, 68.5, 59.0, 58.5, 54.1, 31.9

**Minor:**  $\delta$  161.9, 129.5, 115.8, 107.2, 101.6, 68.8, 58.5, 55.5, 53.1, 31.1

**FTIR (neat)** 3345, 3188, 2928, 2874, 2102, 1662, 1606, 1420, 1278, 1118, 953, 758 cm<sup>-1</sup>

**HRMS (EI)** calcd for [M]<sup>+</sup> C<sub>10</sub>H<sub>13</sub>Br<sub>2</sub>N<sub>5</sub>O<sub>2</sub> 392.9436, found 392.9439

$^1\text{H NMR}$  of **20**

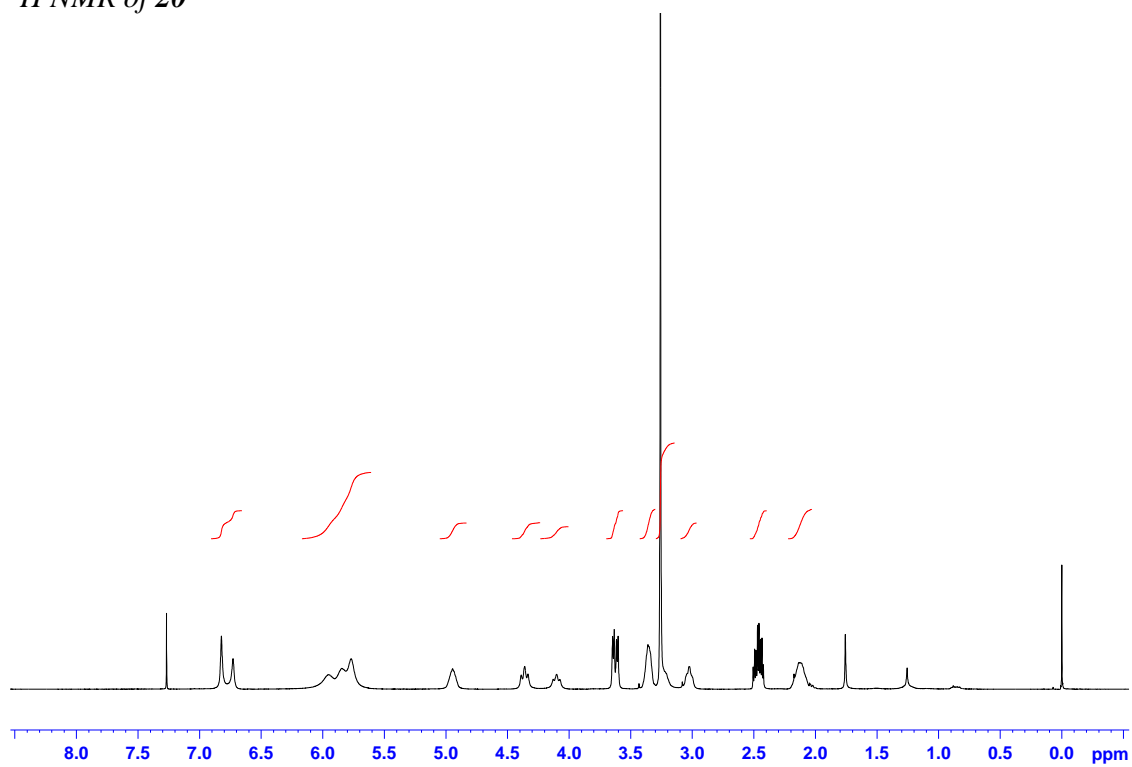

$^{13}\text{C NMR}$  of **20**

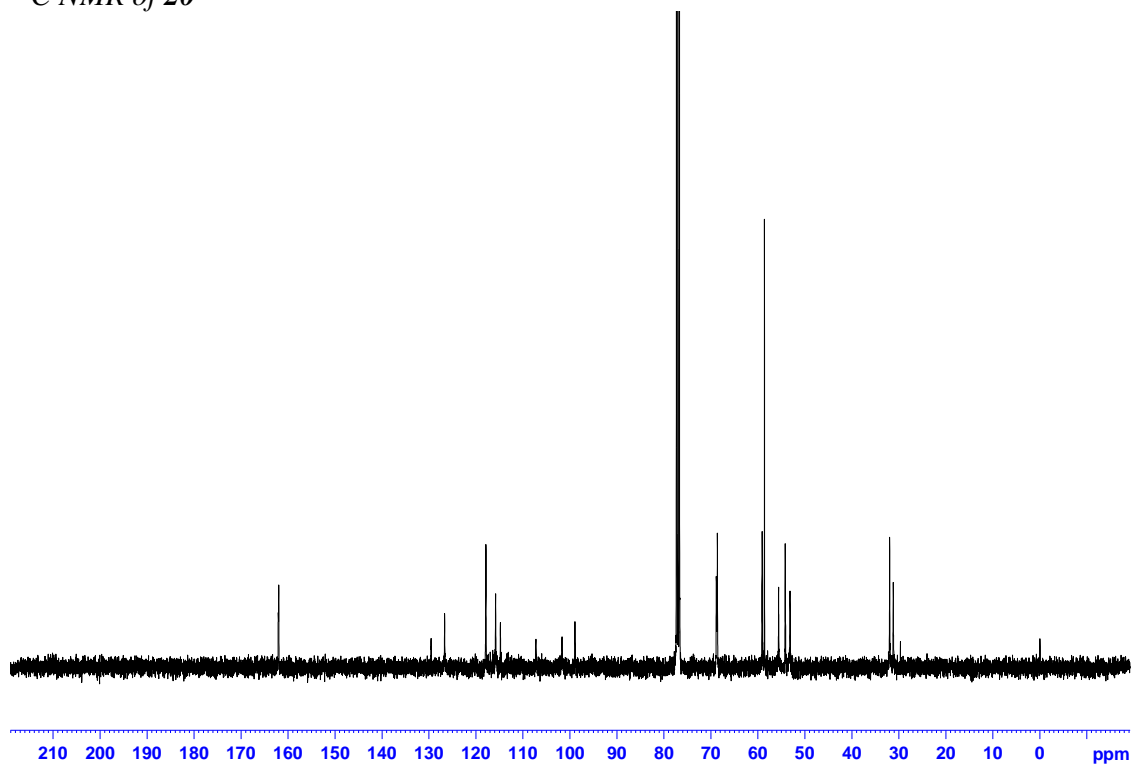



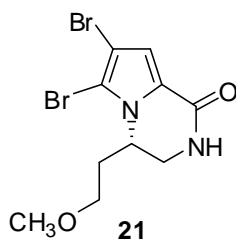

Triphenylphosphine (195 mg, 0.75 mmol) was added to a solution of **20** (135 mg, 0.34 mmol) in tetrahydrofuran (3.4 mL, 0.1 M). The mixture was stirred at rt for 1 h, at which point water (0.037 mL, 2.04 mmol) was added and the mixture was refluxed for 20 h. The solvent removed and the residue was purified by flash chromatography (SiO<sub>2</sub>: 85% EtOAc in hexanes) to give the pyrroloperazinone **21** in 84% yield (100 mg, 0.285 mmol) as a white solid.

**White Solid**

**M.P.** 113~115 °C

$[\alpha]_D^{21}$  -27.1 (c 1, CH<sub>3</sub>OH)

**<sup>1</sup>H NMR (400 MHz, CDCl<sub>3</sub>)** δ 7.26 (br s, 1H), 6.98 (s, 1H), 4.52-4.47 (m, 1H), 3.85 (dd, *J* = 13.2, 4.0 Hz, 1H), 3.65 (dd, *J* = 13.2, 4.8 Hz, 1H), 3.47-3.44 (m, 2H), 3.35 (s, 3H), 2.13-2.04 (m, 1H), 1.96-1.88 (m, 1H)

**<sup>13</sup>C NMR (100 MHz, CDCl<sub>3</sub>)** δ 159.8, 124.7, 115.6, 106.7, 100.5, 68.7, 58.7, 52.0, 42.9, 31.7

**FTIR (neat)** 3215, 3083, 2923, 1651, 1547, 1466, 1427, 1332, 1120, 963, 760 cm<sup>-1</sup>

**HRMS (EI)** calcd for [M]<sup>+</sup> C<sub>10</sub>H<sub>12</sub>Br<sub>2</sub>N<sub>2</sub>O<sub>2</sub> 349.9265, found 349.9266

$^1\text{H NMR}$  of **21**

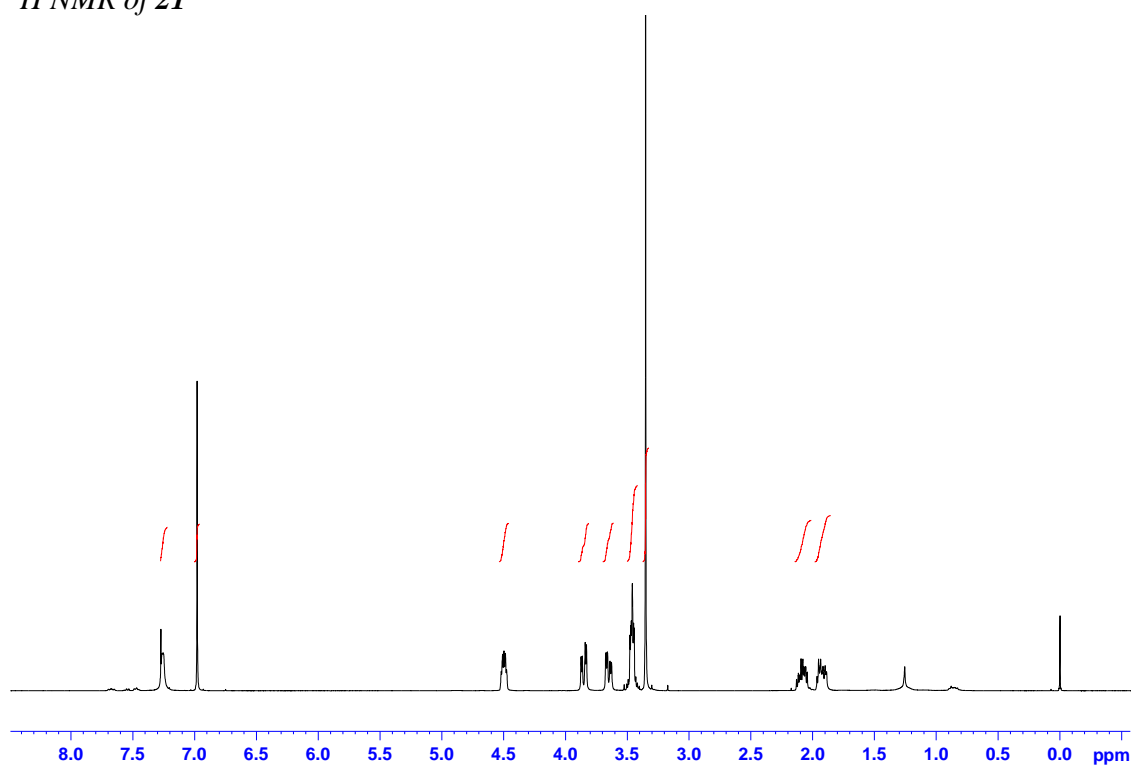

$^{13}\text{C NMR}$  of **21**

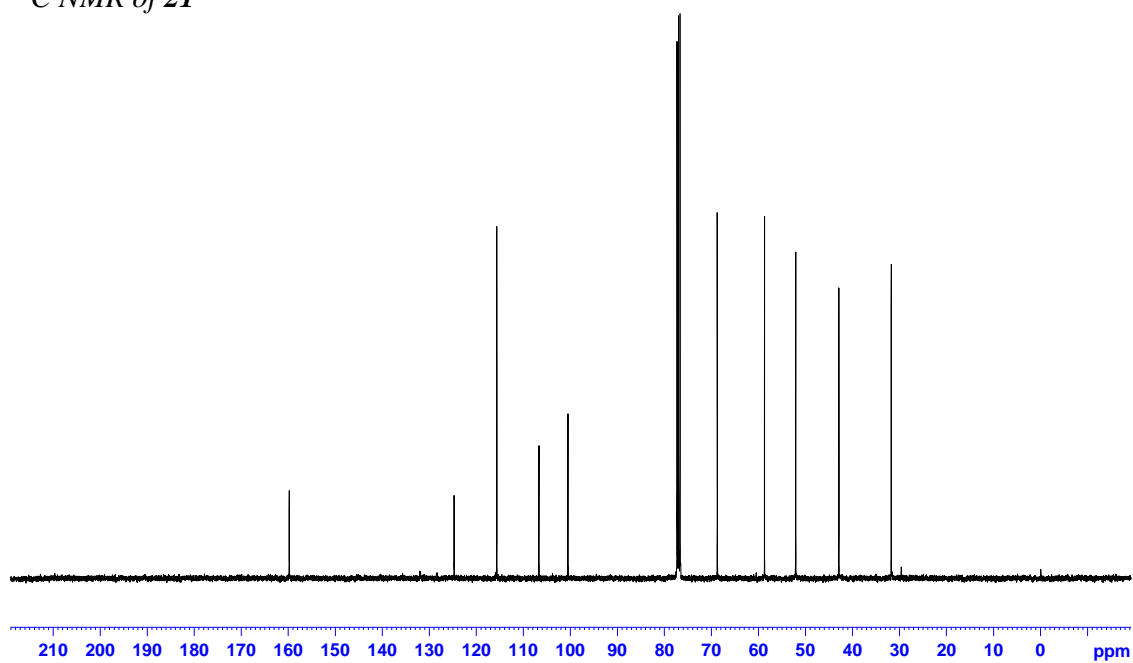

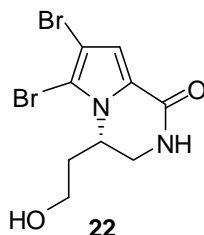

Boron tribromide (1 M solution in dichloromethane, 1.2 mL, 1.2 mmol) was slowly added to a solution of **21** (84 mg, 0.24 mmol) in dichloromethane (2.8 mL, 0.085 M) at  $-20\text{ }^{\circ}\text{C}$ . The mixture was stirred at rt for 6 h and quenched by water. The aqueous layer was extracted twice with ethyl acetate. The combined organic layers were dried over  $\text{MgSO}_4$ . Filtration, concentration, and purification by flash chromatography ( $\text{SiO}_2$ : 5% MeOH in dichloromethane) provided the key intermediate **22** in 85% yield (69 mg, 0.204 mmol) as a white solid.

#### White Solid

**M.P.** 139~141  $^{\circ}\text{C}$

$[\alpha]_D^{19}$   $-28.9$  (c 1,  $\text{CH}_3\text{OH}$ )

**$^1\text{H}$  NMR (400 MHz,  $\text{CD}_3\text{OD}$ )**  $\delta$  6.91 (s, 1H), 4.60-4.56 (m, 1H), 3.81 (dd,  $J = 13.6, 4.0$  Hz, 1H), 3.68-3.63 (m, 3H), 2.03-1.94 (m, 1H), 1.87-1.79 (m, 1H)

**$^{13}\text{C}$  NMR (100 MHz,  $\text{CD}_3\text{OD}$ )**  $\delta$  161.1, 126.1, 116.3, 108.0, 101.2, 59.2, 53.3, 43.3, 35.5

**FTIR (neat)** 3431, 3243, 2921, 1647, 1617, 1545, 1426, 1335, 1053, 960, 750  $\text{cm}^{-1}$

**HRMS (EI)** calcd for  $[\text{M}]^+$   $\text{C}_9\text{H}_{10}\text{Br}_2\text{N}_2\text{O}_2$  335.9109, found 335.9109

$^1\text{H NMR}$  of **22**

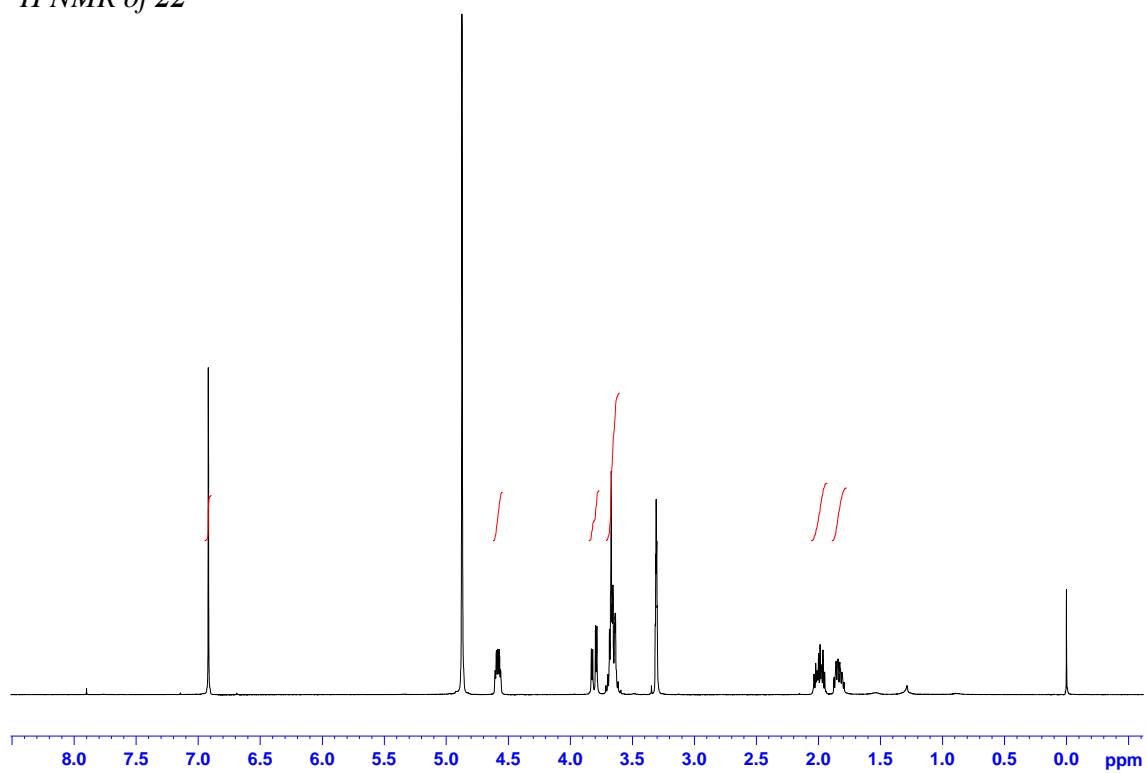

$^{13}\text{C NMR}$  of **22**

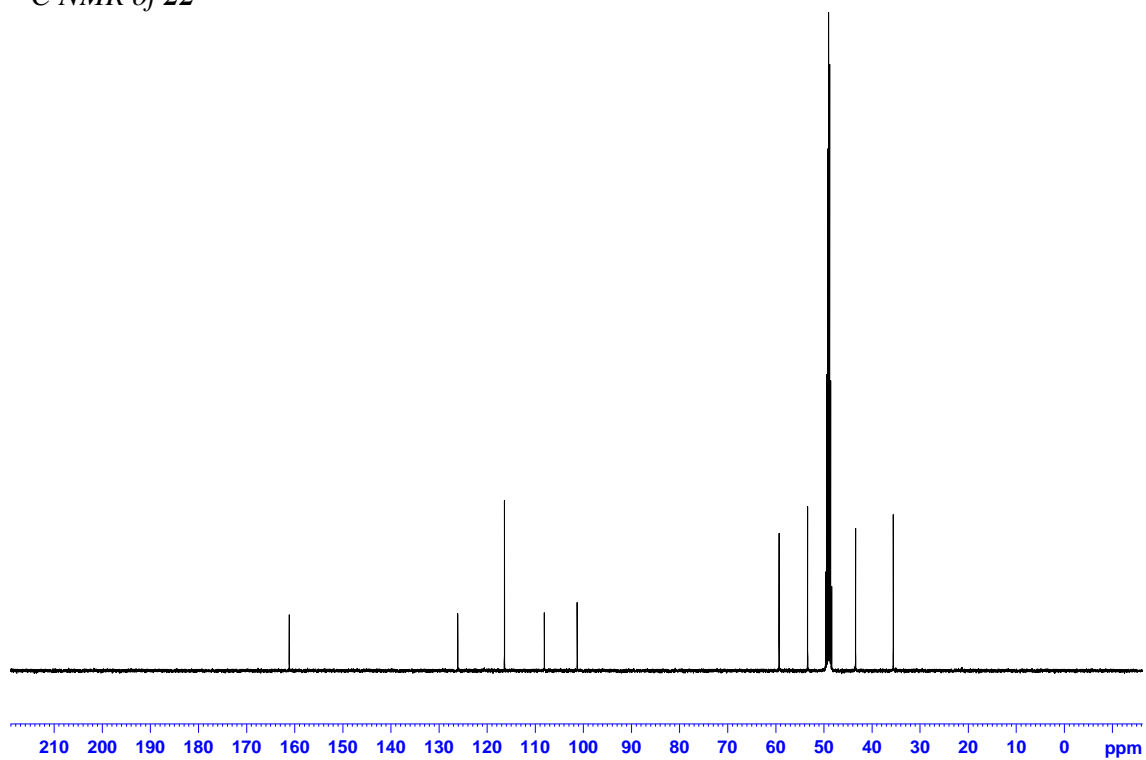

Supplement: c1ob06078c.pdf [file c1ob06078c.pdf]
